# Supplementary material for: Landscape and evolution of tissue-specific alternative polyadenylation across Drosophila species
Source: Genome Biol. 2017 Nov 30;18:229. doi: 10.1186/s13059-017-1358-0 (PMC5707805; doi:10.1186/s13059-017-1358-0)
Supplement: Supplementary file 17 — Conservation of 3′ UTR lengthening in head compared to both male carcass and testis in Drosophila melanogaster/yakuba/virilis. The gene sets shown in Fig. 4j are reported together with the gene symbol and FlyBase ID. (XLSX 61 kb) [file 13059_2017_1358_MOESM17_ESM.xlsx]

## Sheet: Sheet1
intersection	symbol	FlyBase ID
melanogaster/yakuba/virilis	FBgn0000253	Cam
melanogaster/yakuba/virilis	FBgn0000479	dnc
melanogaster/yakuba/virilis	FBgn0000711	flw
melanogaster/yakuba/virilis	FBgn0001122	Galphao
melanogaster/yakuba/virilis	FBgn0001169	H
melanogaster/yakuba/virilis	FBgn0001186	Hex-A
melanogaster/yakuba/virilis	FBgn0002413	dco
melanogaster/yakuba/virilis	FBgn0002973	numb
melanogaster/yakuba/virilis	FBgn0003134	Pp1alpha-96A
melanogaster/yakuba/virilis	FBgn0003435	sm
melanogaster/yakuba/virilis	FBgn0004227	nonA
melanogaster/yakuba/virilis	FBgn0004436	Ubc6
melanogaster/yakuba/virilis	FBgn0004574	Rop
melanogaster/yakuba/virilis	FBgn0004868	Gdi
melanogaster/yakuba/virilis	FBgn0004875	enc
melanogaster/yakuba/virilis	FBgn0004889	tws
melanogaster/yakuba/virilis	FBgn0004921	Ggamma1
melanogaster/yakuba/virilis	FBgn0010113	hdc
melanogaster/yakuba/virilis	FBgn0010352	Nc73EF
melanogaster/yakuba/virilis	FBgn0010379	Akt1
melanogaster/yakuba/virilis	FBgn0011224	heph
melanogaster/yakuba/virilis	FBgn0011648	Mad
melanogaster/yakuba/virilis	FBgn0011818	oaf
melanogaster/yakuba/virilis	FBgn0013576	mtd
melanogaster/yakuba/virilis	FBgn0015509	Cul1
melanogaster/yakuba/virilis	FBgn0015754	Lis-1
melanogaster/yakuba/virilis	FBgn0016694	Pdp1
melanogaster/yakuba/virilis	FBgn0016700	Rab1
melanogaster/yakuba/virilis	FBgn0019968	Khc-73
melanogaster/yakuba/virilis	FBgn0020309	crol
melanogaster/yakuba/virilis	FBgn0020647	KrT95D
melanogaster/yakuba/virilis	FBgn0023407	B4
melanogaster/yakuba/virilis	FBgn0024273	WASp
melanogaster/yakuba/virilis	FBgn0024326	Mkk4
melanogaster/yakuba/virilis	FBgn0024921	Trn
melanogaster/yakuba/virilis	FBgn0025864	Crag
melanogaster/yakuba/virilis	FBgn0026160	tna
melanogaster/yakuba/virilis	FBgn0026189	prominin-like
melanogaster/yakuba/virilis	FBgn0026206	mei-P26
melanogaster/yakuba/virilis	FBgn0027492	wdb
melanogaster/yakuba/virilis	FBgn0028397	Tob
melanogaster/yakuba/virilis	FBgn0028953	CG14478
melanogaster/yakuba/virilis	FBgn0029687	Vap33
melanogaster/yakuba/virilis	FBgn0030089	AP-1gamma
melanogaster/yakuba/virilis	FBgn0030791	CG9132
melanogaster/yakuba/virilis	FBgn0030930	GalNAc-T2
melanogaster/yakuba/virilis	FBgn0031030	Tao
melanogaster/yakuba/virilis	FBgn0031384	CG4238
melanogaster/yakuba/virilis	FBgn0031736	CG11030
melanogaster/yakuba/virilis	FBgn0031897	CG13784
melanogaster/yakuba/virilis	FBgn0032297	CG17124
melanogaster/yakuba/virilis	FBgn0032821	CdGAPr
melanogaster/yakuba/virilis	FBgn0033166	Eaf
melanogaster/yakuba/virilis	FBgn0033313	Cirl
melanogaster/yakuba/virilis	FBgn0033673	CG8298
melanogaster/yakuba/virilis	FBgn0033844	bbc
melanogaster/yakuba/virilis	FBgn0034046	tun
melanogaster/yakuba/virilis	FBgn0035016	CG4612
melanogaster/yakuba/virilis	FBgn0035285	CG12025
melanogaster/yakuba/virilis	FBgn0035397	CG11486
melanogaster/yakuba/virilis	FBgn0035400	CG11537
melanogaster/yakuba/virilis	FBgn0035688	CG10289
melanogaster/yakuba/virilis	FBgn0035850	Atg18a
melanogaster/yakuba/virilis	FBgn0037760	FBXO11
melanogaster/yakuba/virilis	FBgn0038100	Paip2
melanogaster/yakuba/virilis	FBgn0038286	CG6966
melanogaster/yakuba/virilis	FBgn0038488	m-cup
melanogaster/yakuba/virilis	FBgn0038735	CG4662
melanogaster/yakuba/virilis	FBgn0040206	krz
melanogaster/yakuba/virilis	FBgn0040395	Unc-76
melanogaster/yakuba/virilis	FBgn0041111	lilli
melanogaster/yakuba/virilis	FBgn0041188	Atx2
melanogaster/yakuba/virilis	FBgn0042135	CG18812
melanogaster/yakuba/virilis	FBgn0042185	CG18769
melanogaster/yakuba/virilis	FBgn0043884	mask
melanogaster/yakuba/virilis	FBgn0045823	vsg
melanogaster/yakuba/virilis	FBgn0052103	CG32103
melanogaster/yakuba/virilis	FBgn0052264	CG32264
melanogaster/yakuba/virilis	FBgn0053181	CG33181
melanogaster/yakuba/virilis	FBgn0085421	Epac
melanogaster/yakuba/virilis	FBgn0250789	alpha-Spec
melanogaster/yakuba/virilis	FBgn0250791	alphaSnap
melanogaster/yakuba/virilis	FBgn0250823	gish
melanogaster/yakuba/virilis	FBgn0259143	CG42258
melanogaster/yakuba/virilis	FBgn0259745	wech
melanogaster/yakuba/virilis	FBgn0260934	par-1
melanogaster/yakuba/virilis	FBgn0261477	slim
melanogaster/yakuba/virilis	FBgn0261552	ps
melanogaster/yakuba/virilis	FBgn0261617	nej
melanogaster/yakuba/virilis	FBgn0262582	cic
melanogaster/yakuba/virilis	FBgn0262732	mbf1
melanogaster/yakuba/virilis	FBgn0263102	psq
melanogaster/yakuba/virilis	FBgn0263197	Patronin
melanogaster/yakuba/virilis	FBgn0264493	rdx
melanogaster/yakuba/virilis	FBgn0264712	CG1172
melanogaster/yakuba/virilis	FBgn0266409	CG45049
melanogaster/yakuba/virilis	FBgn0266756	btsz
melanogaster/yakuba/virilis	FBgn0267698	Pak
melanogaster/yakuba/virilis	FBgn0267975	vib
melanogaster/yakuba	FBgn0002524	lace
melanogaster/yakuba	FBgn0003310	S
melanogaster/yakuba	FBgn0004907	14-3-3zeta
melanogaster/yakuba	FBgn0004915	TfIIB
melanogaster/yakuba	FBgn0011666	msi
melanogaster/yakuba	FBgn0037613	Cks85A
melanogaster/yakuba	FBgn0050428	CG30428
melanogaster/virilis	FBgn0004177	mts
melanogaster/virilis	FBgn0004435	Galphaq
melanogaster/virilis	FBgn0017581	Lk6
melanogaster/virilis	FBgn0020238	14-3-3epsilon
melanogaster/virilis	FBgn0033092	CG9422
melanogaster/virilis	FBgn0034312	CG10916
melanogaster/virilis	FBgn0037231	Vps24
melanogaster/virilis	FBgn0037241	CG14646
melanogaster/virilis	FBgn0039858	CycG
melanogaster/virilis	FBgn0264357	SNF4Agamma
melanogaster/virilis	FBgn0283472	S6k
melanogaster/virilis	FBgn0283477	SF2
yakuba/virilis	FBgn0010575	sbb
yakuba/virilis	FBgn0261988	Gprk2
melanogaster	FBgn0001218	Hsc70-3
melanogaster	FBgn0003502	Btk29A
melanogaster	FBgn0010247	Parp
melanogaster	FBgn0010313	corto
melanogaster	FBgn0026634	ldlCp
melanogaster	FBgn0028507	CG3793
melanogaster	FBgn0039965	CG13865
yakuba	FBgn0033446	CG1648
