# Supplementary material for: Landscape and evolution of tissue-specific alternative polyadenylation across Drosophila species
Source: Genome Biol. 2017 Nov 30;18:229. doi: 10.1186/s13059-017-1358-0 (PMC5707805; doi:10.1186/s13059-017-1358-0)
Supplement: Supplementary file 18 — Table of conserved miRNA target sites. A summary of conserved TargetScanS miRNA target predictions in both canonical 3′ UTR and newly annotated 3′ UTRs in this study. See the “Methods” section for the criteria of conservation. (XLSX 252 kb) [file 13059_2017_1358_MOESM18_ESM.xlsx]

## Sheet: criteria
This table contains a summary of targetscanS miR target predictions in both canonical 3'UTRs and newly annotated 3'UTRs in this study
For the deeply conserved miRNA sites, site conservation is defined by 9 out of 12 species (D. melanogaster, D. simulans, D. sechellia, D. yakuba, D. erecta, D. ananassae, D. pseudoobscura, D. persimilis, D. willistoni, D. virilis, D. mojavensis, D. grimshawi) and one of 3 species in D. virilis, D. grimshawi, D. mojavensis. Only the strong seeds 7mer-m8 and 8mer were considered
Column header:
3’UTR+3’UTR extension (refer to the total newly annotated 3’UTR space), 3’UTR (refer to canonical 3’UTR space by flyBase 6.1), and 3’UTR extension (refer to extended 3’UTR space identified by this study)

## Sheet: tscan gene-nmirs
gene_symbol	3'UTR + 3'UTR extension	3'UTR	3'UTR extension
para	33	33	0
mamo	29	29	0
hth	23	23	0
bru3	22	22	0
CG15465	21	21	0
CG18265	21	21	0
NaCP60E	21	21	0
Rbp6	21	21	0
hdc	21	21	0
mei-P26	21	21	0
nAChRalpha1	21	21	0
CG46244	20	20	0
scrt	20	20	0
sm	20	20	0
Glut1	19	19	0
lola	19	19	0
mub	19	19	0
CG16779	18	18	0
Eip93F	18	18	0
Glut4EF	18	18	0
CG43739	17	17	0
chinmo	17	17	0
msi	17	16	1
orb	17	17	0
pros	17	17	0
ps	17	17	0
CG43732	16	16	0
cpx	16	16	0
jim	15	15	0
Ace	14	14	0
CG18208	14	14	0
cpo	14	14	0
CG10289	13	13	0
CG12912	13	13	0
Camta	13	13	0
Dop1R1	13	13	0
Nrx-1	13	13	0
nAChRalpha5	13	13	0
nerfin-1	13	13	0
sif	13	13	0
CadN	12	12	0
Nckx30C	12	12	0
Rbfox1	12	12	0
Rbp9	12	12	0
Rdl	12	12	0
SK	12	12	0
bol	12	12	0
br	12	12	0
fru	12	11	1
pns	12	12	0
sqd	12	12	0
AGO1	11	11	0
CG34362	11	11	0
CG43066	11	11	0
CG43729	11	11	0
CG6024	11	11	0
CG9821	11	11	0
GluClalpha	11	11	0
Myo95E	11	11	0
NetB	11	11	0
Sh	11	11	0
Ubx	11	11	0
ab	11	11	0
hid	11	11	0
Ack-like	10	10	0
Blimp-1	10	10	0
CG14446	10	10	0
CG31688	10	10	0
CG32333	10	10	0
CG34355	10	10	0
CG5466	10	10	0
Dscam2	10	10	0
EcR	10	10	0
Fife	10	10	0
Hs3st-A	10	10	0
Mical	10	10	0
RhoGAP100F	10	10	0
Sema-1a	10	10	0
VGlut	10	10	0
chn	10	10	0
fz2	10	10	0
luna	10	10	0
plum	10	10	0
shakB	10	10	0
side	10	10	0
Bsg	9	9	0
CG11505	9	9	0
CG34351	9	9	0
CG34383	9	9	0
CG34384	9	9	0
CG42788	9	9	0
Frl	9	9	0
Gfrl	9	9	0
SKIP	9	9	0
Shaw	9	9	0
ct	9	9	0
elav	9	9	0
enc	9	9	0
gprs	9	9	0
how	9	9	0
jeb	9	9	0
lqf	9	9	0
robo1	9	9	0
shep	9	9	0
tai	9	8	1
ths	9	9	0
zfh1	9	9	0
Adar	8	8	0
CG14459	8	8	0
CG31323	8	8	0
CG32698	8	8	0
CG42260	8	8	0
CG44422	8	8	0
CG45092	8	8	0
CG4911	8	8	0
Corin	8	8	0
Dp1	8	8	0
Dscam1	8	8	0
Plc21C	8	8	0
Rim	8	8	0
Sema-2b	8	8	0
Syn	8	8	0
brat	8	8	0
bru2	8	8	0
btsz	8	8	0
heph	8	8	0
mbl	8	8	0
orb2	8	8	0
pxb	8	8	0
slo	8	8	0
trio	8	8	0
2mit	7	7	0
Antp	7	7	0
Atf3	7	7	0
CG12054	7	7	0
CG12605	7	7	0
CG13506	7	7	0
CG13743	7	7	0
CG31140	7	7	0
CG31221	7	7	0
CG31687	7	7	0
CG43143	7	7	0
CG45087	7	7	0
CG4562	7	7	0
CG4587	7	7	0
Ca-alpha1T	7	7	0
CrebA	7	7	0
Dys	7	7	0
Epac	7	7	0
Fas2	7	7	0
Fur1	7	7	0
GABA-B-R3	7	7	0
Hip14	7	7	0
Hipk	7	7	0
Ih	7	7	0
InR	7	7	0
Kr	7	7	0
Kul	7	7	0
Lrch	7	7	0
Mp	7	7	0
Nak	7	7	0
PsGEF	7	7	0
REPTOR	7	7	0
RhoGAP71E	7	7	0
Shal	7	7	0
Slob	7	7	0
SmD3	7	0	7
Trn	7	7	0
VAChT	7	7	0
bon	7	7	0
dally	7	7	0
dpy	7	7	0
hbs	7	7	0
inaE	7	7	0
mtd	7	7	0
tio	7	7	0
wech	7	7	0
B4	6	6	0
BuGZ	6	6	0
CASK	6	6	0
CG11030	6	6	0
CG13739	6	6	0
CG13954	6	6	0
CG14509	6	6	0
CG14669	6	6	0
CG32085	6	4	2
CG32206	6	6	0
CG32264	6	6	0
CG33143	6	6	0
CG34113	6	6	0
CG34356	6	5	1
CG42404	6	6	0
CG43078	6	6	0
CG4374	6	6	0
CG6006	6	6	0
CG6959	6	6	0
CG8641	6	6	0
Cf2	6	6	0
Cngl	6	6	0
Con	6	6	0
Dyb	6	6	0
Egfr	6	6	0
GluRIB	6	6	0
Imp	6	6	0
Irk1	6	6	0
Khc-73	6	6	0
Klp98A	6	6	0
Mbs	6	6	0
Octbeta3R	6	6	0
Pde1c	6	6	0
Rab2	6	1	5
RtGEF	6	6	0
Sap47	6	6	0
Sema-1b	6	6	0
Shab	6	6	0
Task6	6	6	0
Ten-a	6	6	0
Vps24	6	1	5
X11L	6	6	0
abd-A	6	6	0
babo	6	6	0
beat-IIIc	6	6	0
bru1	6	6	0
cno	6	6	0
dikar	6	6	0
dsx	6	6	0
dysc	6	6	0
eas	6	6	0
ex	6	6	0
fus	6	6	0
gpp	6	6	0
heix	6	6	0
homer	6	6	0
inv	6	6	0
lute	6	6	0
nmo	6	6	0
olf413	6	6	0
px	6	6	0
rin	6	6	0
roq	6	6	0
rst	6	6	0
scrib	6	6	0
sky	6	6	0
sls	6	6	0
svp	6	6	0
tinc	6	6	0
ttk	6	6	0
unc-13-4A	6	6	0
zld	6	6	0
4EHP	5	5	0
5-HT7	5	5	0
Appl	5	4	1
Bx	5	5	0
CG10077	5	5	0
CG10384	5	5	0
CG11319	5	5	0
CG11883	5	5	0
CG11897	5	5	0
CG12290	5	5	0
CG12484	5	5	0
CG12531	5	4	1
CG13300	5	5	0
CG13784	5	5	0
CG18812	5	5	0
CG30419	5	5	0
CG30463	5	5	0
CG32152	5	5	0
CG33090	5	5	0
CG34394	5	5	0
CG3638	5	5	0
CG42342	5	5	0
CG42458	5	5	0
CG42534	5	5	0
CG42663	5	5	0
CG4297	5	5	0
CG43187	5	5	0
CG43861	5	3	2
CG4393	5	5	0
CG45086	5	5	0
CG5805	5	5	0
CG7705	5	2	3
CG7708	5	5	0
CG8500	5	5	0
CG8786	5	5	0
CG9171	5	5	0
CG9636	5	5	0
Calx	5	5	0
Cbl	5	5	0
Cdep	5	5	0
CtBP	5	4	1
Cyp12d1-p	5	5	0
DCP2	5	5	0
Drep1	5	5	0
Dscam4	5	3	2
E(bx)	5	5	0
E(spl)m5-HLH	5	5	0
E(spl)mdelta-HLH	5	5	0
Eip63E	5	5	0
Eip74EF	5	5	0
Eip78C	5	5	0
EndoA	5	5	0
Fur2	5	5	0
Galphao	5	5	0
Galphaq	5	5	0
Gycbeta100B	5	5	0
Hr4	5	5	0
Kah	5	5	0
LRR	5	5	0
LanB2	5	5	0
Lar	5	5	0
MESK2	5	5	0
Mef2	5	5	0
Mf	5	5	0
NKAIN	5	5	0
Nf1	5	5	0
Notum	5	5	0
Pka-R2	5	5	0
Pkc53E	5	5	0
Ptp10D	5	5	0
Rbp	5	5	0
RhoGAP68F	5	5	0
Ric	5	5	0
RunxA	5	5	0
S	5	5	0
S6k	5	5	0
SIFaR	5	5	0
Saf-B	5	5	0
Samuel	5	5	0
Spt20	5	5	0
Src64B	5	5	0
Syp	5	5	0
Tango13	5	5	0
Teh1	5	5	0
Tet	5	5	0
Timp	5	5	0
Tl	5	4	1
Toll-7	5	5	0
Tom	5	5	0
Ts	5	5	0
Unr	5	4	1
aop	5	5	0
apt	5	5	0
brp	5	5	0
bs	5	5	0
caps	5	5	0
dsd	5	5	0
ens	5	5	0
fabp	5	5	0
futsch	5	5	0
fz	5	5	0
haf	5	3	2
jing	5	5	0
jumu	5	5	0
kn	5	5	0
kuz	5	5	0
l(3)L1231	5	5	0
larp	5	5	0
mbc	5	5	0
mirr	5	5	0
mura	5	5	0
mxt	5	5	0
net	5	5	0
neur	5	5	0
pnut	5	3	2
pum	5	5	0
put	5	5	0
qkr54B	5	5	0
qvr	5	5	0
rgn	5	5	0
sha	5	5	0
smog	5	5	0
spg	5	5	0
spir	5	5	0
sr	5	5	0
sty	5	3	2
tau	5	5	0
tmod	5	5	0
trx	5	5	0
vvl	5	5	0
wb	5	5	0
yrt	5	5	0
5-HT1B	4	4	0
Abd-B	4	4	0
Aef1	4	4	0
Art4	4	1	3
CG10019	4	4	0
CG10055	4	4	0
CG10082	4	4	0
CG10345	4	4	0
CG10543	4	4	0
CG11247	4	4	0
CG11406	4	4	0
CG12769	4	4	0
CG12831	4	4	0
CG13465	4	4	0
CG13631	4	4	0
CG14042	4	4	0
CG14082	4	4	0
CG14274	4	4	0
CG14478	4	4	0
CG14853	4	4	0
CG15312	4	4	0
CG17193	4	4	0
CG17816	4	4	0
CG18480	4	4	0
CG18769	4	4	0
CG18870	4	4	0
CG30083	4	0	4
CG31122	4	4	0
CG31145	4	4	0
CG31176	4	4	0
CG31195	4	4	0
CG31635	4	4	0
CG31814	4	4	0
CG32103	4	4	0
CG32137	4	4	0
CG32369	4	4	0
CG32447	4	4	0
CG32676	4	4	0
CG3308	4	4	0
CG33111	4	4	0
CG33181	4	4	0
CG34114	4	4	0
CG34377	4	4	0
CG34380	4	4	0
CG34401	4	4	0
CG3548	4	4	0
CG42337	4	4	0
CG4238	4	4	0
CG42613	4	4	0
CG42700	4	4	0
CG42747	4	4	0
CG42750	4	4	0
CG43102	4	4	0
CG43449	4	4	0
CG43707	4	4	0
CG43778	4	4	0
CG44838	4	4	0
CG45068	4	4	0
CG4577	4	4	0
CG5026	4	3	1
CG5746	4	3	1
CG5890	4	4	0
CG5953	4	4	0
CG7369	4	4	0
CG7492	4	4	0
CG7601	4	1	3
CG7927	4	3	1
CG8303	4	4	0
CG8475	4	4	0
CG9098	4	4	0
CG9257	4	4	0
CG9650	4	4	0
CG9760	4	4	0
CG9813	4	4	0
Ca-beta	4	4	0
Cad87A	4	4	0
Cam	4	4	0
CanA-14F	4	4	0
ChAT	4	4	0
Cip4	4	4	0
Clk	4	4	0
CycY	4	4	0
Dll	4	4	0
Dop1R2	4	4	0
E(spl)m4-BFM	4	4	0
Eaat1	4	4	0
Ect4	4	4	0
Efa6	4	4	0
EloB	4	3	1
Fili	4	4	0
Frq1	4	4	0
Gbs-70E	4	4	0
Gclm	4	1	3
Ggamma1	4	4	0
Ggamma30A	4	4	0
H	4	4	0
HPS4	4	3	1
Hr38	4	4	0
Irk2	4	4	0
Lerp	4	2	2
Mkp3	4	4	0
Ndae1	4	4	0
Nedd4	4	4	0
Nhe2	4	4	0
Nmdar2	4	4	0
Nrt	4	4	0
Octbeta2R	4	4	0
Osi7	4	4	0
Pak	4	4	0
Pde6	4	3	1
Pdp1	4	4	0
Pino	4	4	0
Pp2B-14D	4	3	1
Ptp99A	4	4	0
RYBP	4	4	0
Rab3	4	4	0
Rab8	4	4	0
Reck	4	4	0
Rgk3	4	4	0
Rgl	4	4	0
RhoGAP92B	4	4	0
Root	4	4	0
SERCA	4	4	0
SP2353	4	4	0
Sesn	4	4	0
Sik3	4	4	0
Smurf	4	4	0
Spec2	4	4	0
Spn	4	4	0
SppL	4	2	2
Srpk79D	4	4	0
Stat92E	4	4	0
Su(Tpl)	4	4	0
Sur-8	4	4	0
Swim	4	4	0
Syt1	4	4	0
TER94	4	1	3
Ten-m	4	4	0
Trp1	4	4	0
Usp10	4	4	0
Usp32	4	4	0
WASp	4	4	0
Zn72D	4	4	0
alpha-Est10	4	2	2
alt	4	4	0
aux	4	4	0
beat-Ic	4	4	0
beat-VII	4	4	0
beta4GalNAcTA	4	4	0
bgm	4	4	0
bi	4	4	0
cac	4	4	0
cic	4	4	0
comm2	4	2	2
cos	4	4	0
cue	4	4	0
dco	4	4	0
dlg1	4	4	0
dpr14	4	4	0
eIF-2gamma	4	3	1
ems	4	4	0
fas	4	4	0
fkh	4	4	0
flw	4	4	0
fne	4	4	0
form3	4	3	1
grh	4	4	0
hep	4	4	0
hts	4	4	0
ihog	4	4	0
inc	4	4	0
jvl	4	4	0
kay	4	4	0
lili	4	4	0
lost	4	4	0
mAChR-A	4	4	0
melt	4	4	0
nAChRalpha3	4	4	0
nAChRbeta2	4	4	0
nkd	4	4	0
odd	4	4	0
pgant5	4	4	0
pins	4	4	0
pyd	4	4	0
repo	4	4	0
rhea	4	4	0
rogdi	4	4	0
salm	4	4	0
sbb	4	4	0
sens-2	4	4	0
sinu	4	4	0
slif	4	4	0
srp	4	4	0
stan	4	4	0
stet	4	4	0
tey	4	3	1
tnc	4	4	0
tok	4	4	0
tutl	4	4	0
unk	4	4	0
ush	4	4	0
uzip	4	4	0
wls	4	4	0
wts	4	4	0
yata	4	4	0
AP-1gamma	3	3	0
AP-2mu	3	3	0
ATPCL	3	2	1
Abl	3	3	0
AcCoAS	3	3	0
AdSL	3	3	0
Adat1	3	3	0
Alk	3	3	0
Amph	3	3	0
Amun	3	3	0
Asap	3	3	0
Atg17	3	3	0
Awh	3	3	0
Axud1	3	3	0
BobA	3	3	0
Bsg25D	3	3	0
CG10217	3	3	0
CG10804	3	3	0
CG11593	3	3	0
CG11671	3	0	3
CG1172	3	3	0
CG11781	3	0	3
CG12004	3	3	0
CG12091	3	3	0
CG12344	3	3	0
CG12773	3	3	0
CG12851	3	3	0
CG13054	3	0	3
CG13197	3	3	0
CG13255	3	2	1
CG13293	3	3	0
CG13384	3	3	0
CG13827	3	0	3
CG13995	3	3	0
CG1402	3	3	0
CG14186	3	3	0
CG14506	3	3	0
CG15097	3	3	0
CG15236	3	3	0
CG15270	3	3	0
CG1607	3	3	0
CG1646	3	3	0
CG16791	3	3	0
CG16947	3	3	0
CG16953	3	3	0
CG17386	3	3	0
CG17765	3	2	1
CG18815	3	3	0
CG1902	3	3	0
CG2865	3	3	0
CG30069	3	3	0
CG30116	3	3	0
CG30158	3	3	0
CG31712	3	3	0
CG32195	3	3	0
CG32432	3	0	3
CG32532	3	3	0
CG32813	3	3	0
CG32815	3	3	0
CG33082	3	3	0
CG33543	3	3	0
CG3409	3	3	0
CG34126	3	3	0
CG34313	3	3	0
CG34353	3	3	0
CG34354	3	3	0
CG34357	3	3	0
CG34371	3	3	0
CG34376	3	3	0
CG3556	3	3	0
CG3611	3	3	0
CG3714	3	3	0
CG3822	3	3	0
CG3961	3	3	0
CG4022	3	3	0
CG42261	3	3	0
CG42265	3	3	0
CG42306	3	3	0
CG42324	3	3	0
CG42492	3	3	0
CG42502	3	3	0
CG42594	3	3	0
CG42676	3	3	0
CG42724	3	3	0
CG43291	3	3	0
CG43340	3	3	0
CG43693	3	3	0
CG43867	3	3	0
CG43921	3	3	0
CG45085	3	3	0
CG45186	3	3	0
CG45263	3	3	0
CG4610	3	0	3
CG4619	3	3	0
CG4658	3	3	0
CG4896	3	3	0
CG5149	3	3	0
CG5521	3	3	0
CG5549	3	3	0
CG5644	3	0	3
CG5850	3	3	0
CG5916	3	3	0
CG6282	3	3	0
CG6424	3	3	0
CG6583	3	3	0
CG6650	3	3	0
CG7510	3	3	0
CG7606	3	3	0
CG7837	3	1	2
CG8079	3	3	0
CG8321	3	3	0
CG9005	3	1	2
CG9135	3	3	0
CG9376	3	2	1
CG9657	3	3	0
CG9674	3	3	0
CG9801	3	3	0
CG9896	3	3	0
CG9932	3	3	0
CG9990	3	3	0
Ca-alpha1D	3	3	0
Caper	3	3	0
Cerk	3	3	0
Chd64	3	3	0
Cht7	3	3	0
CycG	3	3	0
Cyp6a18	3	3	0
D	3	3	0
DIP-beta	3	3	0
DIP-eta	3	3	0
Dap160	3	3	0
Dhit	3	3	0
Dl	3	3	0
Doc3	3	3	0
Drep4	3	2	1
Drl-2	3	3	0
Dyrk2	3	3	0
E(spl)m3-HLH	3	3	0
E(spl)malpha-BFM	3	3	0
ETHR	3	3	0
Ef1alpha48D	3	3	0
Ephrin	3	3	0
Ero1L	3	3	0
FER	3	3	0
Fmr1	3	3	0
GEFmeso	3	3	0
Girdin	3	3	0
Gprk2	3	3	0
Gug	3	3	0
Hr39	3	3	0
Hs2st	3	3	0
Hsepi	3	3	0
IA-2	3	3	0
INPP5E	3	3	0
ITP	3	3	0
Kank	3	3	0
Kdm4B	3	3	0
Lap1	3	3	0
Liprin-alpha	3	3	0
List	3	3	0
Lnk	3	3	0
MED19	3	3	0
MTA1-like	3	2	1
Magi	3	3	0
Mes2	3	3	0
Mlc2	3	3	0
Mlp84B	3	3	0
Mmp1	3	3	0
Msp300	3	3	0
Mtl	3	3	0
NK7.1	3	3	0
Naa60	3	3	0
Nlp	3	2	1
Nos	3	3	0
Nplp1	3	3	0
Nrg	3	3	0
Nrx-IV	3	3	0
Oct-TyrR	3	3	0
Octbeta1R	3	3	0
Oli	3	3	0
Opa1	3	3	0
Osi6	3	3	0
Osi9	3	3	0
P5CDh1	3	2	1
PDZ-GEF	3	3	0
Patronin	3	3	0
Pcl	3	3	0
Pde9	3	3	0
Pdk	3	3	0
Pis	3	3	0
Pka-C1	3	3	0
Pkc98E	3	3	0
Ppa	3	3	0
Prosap	3	3	0
Pura	3	3	0
RASSF8	3	3	0
Rack1	3	3	0
Rap1	3	3	0
Reg-5	3	3	0
Reph	3	3	0
Reps	3	3	0
Ret	3	3	0
Rgk1	3	3	0
Rgk2	3	3	0
Rh7	3	3	0
RhoGDI	3	3	0
SMSr	3	3	0
SP555	3	3	0
Sam-S	3	3	0
Sec61alpha	3	3	0
Sema-5c	3	3	0
Sk2	3	3	0
Smg5	3	3	0
Socs44A	3	3	0
Spred	3	3	0
Swip-1	3	3	0
Sxl	3	3	0
Syn1	3	3	0
Sytbeta	3	3	0
T48	3	3	0
TkR99D	3	3	0
Tm1	3	3	0
Tollo	3	3	0
Trpm	3	3	0
Tsp26A	3	3	0
Tsp66E	3	3	0
Usp2	3	3	0
VGAT	3	3	0
Vang	3	3	0
Vha68-1	3	3	0
Vmat	3	3	0
Vrp1	3	3	0
akirin	3	3	0
amon	3	3	0
app	3	3	0
bab1	3	3	0
beat-Ia	3	3	0
bnl	3	3	0
by	3	3	0
cdc14	3	3	0
cert	3	3	0
crb	3	3	0
didum	3	3	0
dl	3	3	0
dnc	3	3	0
dpp	3	3	0
dpr11	3	3	0
eIF4G2	3	3	0
eag	3	3	0
ec	3	3	0
esn	3	3	0
ewg	3	3	0
ey	3	3	0
fdl	3	3	0
flfl	3	3	0
fwe	3	3	0
gish	3	3	0
grim	3	3	0
h	3	3	0
hb	3	3	0
ics	3	1	2
if	3	3	0
insb	3	3	0
jdp	3	3	0
koi	3	3	0
l(2)01289	3	3	0
l(3)neo38	3	3	0
lab	3	3	0
lama	3	3	0
lig	3	3	0
lilli	3	3	0
lov	3	3	0
mam	3	3	0
meso18E	3	3	0
metro	3	3	0
mim	3	3	0
nAChRalpha6	3	3	0
nub	3	3	0
nudE	3	0	3
nuf	3	3	0
obst-E	3	3	0
osp	3	3	0
p130CAS	3	3	0
par-1	3	3	0
path	3	3	0
pdm2	3	3	0
plx	3	2	1
pnr	3	2	1
pod1	3	3	0
psq	3	3	0
rdgB	3	3	0
retn	3	3	0
rho	3	3	0
ric8a	3	3	0
rn	3	3	0
sNPF-R	3	3	0
sano	3	3	0
sba	3	3	0
scra	3	3	0
sdk	3	3	0
seq	3	3	0
shg	3	3	0
sick	3	3	0
siz	3	3	0
skl	3	3	0
smg	3	3	0
sna	3	3	0
sns	3	3	0
spen	3	3	0
ss	3	3	0
stj	3	3	0
subdued	3	3	0
tap	3	3	0
tll	3	3	0
toc	3	3	0
tou	3	3	0
unc-104	3	3	0
unc-13	3	3	0
upSET	3	3	0
vimar	3	3	0
wake	3	3	0
wdb	3	3	0
wg	3	3	0
wge	3	3	0
wit	3	3	0
zfh2	3	3	0
5-HT1A	2	2	0
AP-1sigma	2	2	0
Ac3	2	2	0
Ac78C	2	2	0
Acon	2	2	0
AdamTS-A	2	2	0
Afti	2	2	0
Arf51F	2	2	0
Arr1	2	2	0
Ars2	2	2	0
Atg18b	2	2	0
Atox1	2	2	0
BOD1	2	2	0
Bacc	2	2	0
Bgb	2	2	0
Bmcp	2	2	0
BtbVII	2	2	0
Btk29A	2	2	0
C15	2	2	0
CAP	2	2	0
CCAP-R	2	2	0
CG10005	2	2	0
CG10151	2	2	0
CG10195	2	2	0
CG10254	2	2	0
CG10338	2	2	0
CG10361	2	2	0
CG10444	2	2	0
CG10512	2	2	0
CG10570	2	2	0
CG10663	2	2	0
CG10710	2	2	0
CG10734	2	0	2
CG10737	2	2	0
CG1090	2	2	0
CG10936	2	2	0
CG10953	2	2	0
CG10960	2	2	0
CG11044	2	2	0
CG11221	2	2	0
CG1136	2	2	0
CG11486	2	2	0
CG11576	2	2	0
CG11652	2	2	0
CG11873	2	2	0
CG11880	2	2	0
CG12024	2	2	0
CG12025	2	2	0
CG12071	2	2	0
CG12075	2	2	0
CG12194	2	2	0
CG12213	2	2	0
CG1265	2	0	2
CG1273	2	2	0
CG12814	2	2	0
CG12858	2	2	0
CG13124	2	2	0
CG1317	2	2	0
CG13287	2	2	0
CG13344	2	2	0
CG13398	2	2	0
CG13578	2	2	0
CG13579	2	2	0
CG1358	2	2	0
CG13606	2	2	0
CG13685	2	2	0
CG13796	2	2	0
CG13917	2	2	0
CG13933	2	2	0
CG14131	2	2	0
CG14372	2	0	2
CG14395	2	2	0
CG14454	2	2	0
CG14535	2	2	0
CG14562	2	2	0
CG14608	2	2	0
CG14693	2	2	0
CG14718	2	2	0
CG14949	2	2	0
CG14964	2	2	0
CG15080	2	2	0
CG15431	2	2	0
CG15673	2	2	0
CG15725	2	2	0
CG1673	2	2	0
CG17271	2	2	0
CG17360	2	2	0
CG17593	2	2	0
CG17724	2	2	0
CG17786	2	2	0
CG17807	2	0	2
CG17834	2	2	0
CG17985	2	2	0
CG1814	2	2	0
CG18420	2	2	0
CG18549	2	2	0
CG2082	2	2	0
CG2162	2	2	0
CG2217	2	2	0
CG2269	2	2	0
CG2519	2	2	0
CG2528	2	2	0
CG2841	2	2	0
CG2991	2	2	0
CG30177	2	2	0
CG30222	2	2	0
CG30343	2	2	0
CG3036	2	2	0
CG30497	2	2	0
CG31075	2	1	1
CG31206	2	0	2
CG31224	2	2	0
CG31431	2	2	0
CG31475	2	2	0
CG31523	2	2	0
CG3163	2	0	2
CG31637	2	2	0
CG31678	2	2	0
CG31730	2	0	2
CG31760	2	1	1
CG31849	2	2	0
CG32219	2	0	2
CG32278	2	0	2
CG32425	2	2	0
CG32486	2	2	0
CG32521	2	2	0
CG32758	2	2	0
CG33096	2	2	0
CG33203	2	2	0
CG33298	2	2	0
CG33521	2	2	0
CG33970	2	2	0
CG33981	2	2	0
CG3408	2	2	0
CG34133	2	0	2
CG34155	2	2	0
CG34342	2	2	0
CG34347	2	2	0
CG34398	2	2	0
CG34449	2	2	0
CG34461	2	2	0
CG3534	2	2	0
CG3655	2	2	0
CG3760	2	1	1
CG3764	2	2	0
CG3793	2	2	0
CG3800	2	2	0
CG3829	2	2	0
CG4168	2	2	0
CG42245	2	2	0
CG42307	2	2	0
CG42322	2	2	0
CG42327	2	2	0
CG42340	2	2	0
CG42455	2	2	0
CG42540	2	2	0
CG4266	2	2	0
CG42671	2	2	0
CG42674	2	2	0
CG4269	2	2	0
CG42741	2	2	0
CG42784	2	2	0
CG42817	2	2	0
CG4313	2	2	0
CG43155	2	2	0
CG43232	2	2	0
CG43320	2	2	0
CG43333	2	2	0
CG43367	2	2	0
CG43373	2	2	0
CG43394	2	2	0
CG43427	2	2	0
CG43689	2	2	0
CG43759	2	2	0
CG43780	2	2	0
CG43781	2	2	0
CG43783	2	2	0
CG43795	2	2	0
CG43897	2	2	0
CG43938	2	2	0
CG43954	2	2	0
CG4406	2	0	2
CG4408	2	2	0
CG44098	2	2	0
CG4433	2	2	0
CG4455	2	2	0
CG4495	2	2	0
CG45050	2	2	0
CG45075	2	2	0
CG45088	2	2	0
CG45093	2	2	0
CG4607	2	2	0
CG4928	2	2	0
CG5028	2	2	0
CG5151	2	2	0
CG5214	2	2	0
CG5388	2	2	0
CG5397	2	2	0
CG5412	2	0	2
CG5516	2	2	0
CG5554	2	2	0
CG5599	2	2	0
CG5611	2	1	1
CG5674	2	2	0
CG5728	2	2	0
CG5758	2	2	0
CG5835	2	2	0
CG5910	2	2	0
CG5921	2	2	0
CG6163	2	2	0
CG6175	2	2	0
CG6329	2	2	0
CG6614	2	2	0
CG6685	2	2	0
CG6707	2	2	0
CG6865	2	2	0
CG6980	2	2	0
CG7191	2	2	0
CG7222	2	1	1
CG7330	2	2	0
CG7378	2	2	0
CG7381	2	2	0
CG7466	2	2	0
CG7536	2	2	0
CG7565	2	2	0
CG7639	2	2	0
CG7720	2	2	0
CG7884	2	2	0
CG7971	2	2	0
CG8026	2	2	0
CG8177	2	2	0
CG8192	2	2	0
CG8320	2	2	0
CG8398	2	2	0
CG8405	2	2	0
CG8481	2	2	0
CG8498	2	2	0
CG8611	2	2	0
CG8630	2	2	0
CG8861	2	2	0
CG8910	2	2	0
CG8993	2	2	0
CG9205	2	0	2
CG9265	2	2	0
CG9368	2	2	0
CG9384	2	2	0
CG9395	2	2	0
CG9505	2	2	0
CG9536	2	2	0
CG9727	2	2	0
CG9855	2	2	0
CHES-1-like	2	2	0
Cad89D	2	2	0
CalpB	2	2	0
Cct1	2	2	0
CdGAPr	2	2	0
Cks85A	2	2	0
ClC-c	2	2	0
Cpr66Cb	2	2	0
Crtc	2	2	0
Cwc25	2	0	2
CycE	2	2	0
Cyp312a1	2	2	0
DAT	2	2	0
DIP-alpha	2	2	0
DIP-delta	2	2	0
DNApol-eta	2	0	2
Dd	2	2	0
Ddr	2	2	0
Deaf1	2	1	1
Dgk	2	2	0
Dh31-R	2	2	0
Dlg5	2	2	0
Dot	2	0	2
Drep3	2	2	0
Dysb	2	2	0
E(Pc)	2	2	0
E(spl)m7-HLH	2	2	0
E(spl)m8-HLH	2	2	0
E(spl)mgamma-HLH	2	2	0
E23	2	2	0
E5	2	2	0
Eaat2	2	2	0
Eaf	2	2	0
Ef1alpha100E	2	2	0
Eip75B	2	2	0
Evi5	2	2	0
FASN1	2	2	0
FMRFaR	2	2	0
Fhos	2	2	0
Flo2	2	2	0
Frq2	2	2	0
Fs	2	2	0
Fs(2)Ket	2	2	0
GABA-B-R1	2	2	0
GC1	2	2	0
GMF	2	2	0
GPHR	2	2	0
GalNAc-T1	2	2	0
Galphai	2	2	0
GatC	2	2	0
Gbs-76A	2	2	0
Gli	2	2	0
Grd	2	2	0
Grip84	2	2	0
Gyc76C	2	2	0
HGTX	2	2	0
Hr3	2	2	0
ImpE1	2	2	0
ImpL2	2	2	0
Indy	2	2	0
Ire1	2	2	0
JhI-21	2	2	0
KCNQ	2	2	0
KLHL18	2	2	0
Kat60	2	2	0
Klp64D	2	2	0
Klp68D	2	2	0
Kr-h1	2	2	0
Krn	2	2	0
LRP1	2	2	0
LanA	2	2	0
Lasp	2	2	0
Lim3	2	2	0
Lmx1a	2	2	0
LpR2	2	2	0
MESR3	2	2	0
Meltrin	2	2	0
Mhc	2	2	0
Mid1	2	2	0
Mipp1	2	2	0
Mkk4	2	2	0
Mms19	2	2	0
Mo25	2	2	0
Mrtf	2	2	0
Msh6	2	2	0
MtnD	2	0	2
Muc91C	2	2	0
Mvl	2	2	0
Myc	2	2	0
Myd88	2	2	0
ND-B18	2	2	0
NFAT	2	2	0
NT1	2	2	0
Ncoa6	2	2	0
Nep3	2	2	0
NimB1	2	0	2
Nlg3	2	2	0
Nmdar1	2	2	0
Nop60B	2	2	0
Nurf-38	2	0	2
Oamb	2	2	0
Or10a	2	2	0
Osi8	2	2	0
PAPLA1	2	2	0
Pc	2	2	0
Pde8	2	2	0
Pep	2	1	1
Pi3K21B	2	2	0
Pi3K68D	2	2	0
Pi3K92E	2	2	0
Plp	2	2	0
Ppcs	2	2	0
Ppt2	2	2	0
ProRS-m	2	2	0
Proc-R	2	1	1
Psa	2	2	0
Psi	2	2	0
Ptp36E	2	2	0
Ptpmeg2	2	2	0
Ptx1	2	2	0
Pvf2	2	2	0
Pvf3	2	2	0
RIC-3	2	2	0
Rab26	2	2	0
Rab3-GEF	2	2	0
Ras64B	2	2	0
Ras85D	2	2	0
Reep1	2	2	0
Rep	2	1	1
Rfx	2	2	0
RhoGAP19D	2	2	0
RhoGEF3	2	2	0
Rtnl1	2	2	0
RunxB	2	2	0
SCAR	2	2	0
SLC5A11	2	2	0
Scr	2	2	0
Sdc	2	2	0
Sec10	2	1	1
Sema-2a	2	2	0
Ser	2	2	0
Sidpn	2	2	0
Sin3A	2	2	0
Slh	2	2	0
Slik	2	2	0
Snoo	2	2	0
Snx3	2	2	0
Sox102F	2	2	0
Sox21b	2	2	0
Spp	2	2	0
Strn-Mlck	2	2	0
Sulf1	2	2	0
Syt12	2	2	0
TM4SF	2	2	0
Tektin-C	2	2	0
Tgi	2	2	0
Thd1	2	2	0
Tie	2	2	0
Tina-1	2	2	0
Tis11	2	2	0
Tk	2	2	0
Toll-6	2	2	0
Toll-9	2	2	0
Trim9	2	2	0
Trl	2	2	0
Tsp5D	2	2	0
Tsp96F	2	2	0
Ttd14	2	2	0
Tusp	2	2	0
Uba1	2	0	2
Usp1	2	2	0
Usp15-31	2	2	0
Vha26	2	2	0
Vha44	2	2	0
Vha68-2	2	2	0
VhaM8.9	2	2	0
Vps13	2	2	0
Vta1	2	0	2
Zasp52	2	1	1
Ziz	2	2	0
acj6	2	2	0
ago	2	2	0
agt	2	2	0
alph	2	2	0
alpha-Est9	2	2	0
alpha-Man-IIb	2	2	0
alpha-Man-Ib	2	0	2
alphaTub84B	2	0	2
ana	2	2	0
ap	2	2	0
arr	2	2	0
atl	2	2	0
babos	2	1	1
bbg	2	2	0
bc10	2	2	0
bcd	2	0	2
bchs	2	2	0
beat-IIIa	2	2	0
beat-VI	2	2	0
beat-Vc	2	2	0
bin3	2	2	0
blot	2	2	0
bor	2	2	0
btl	2	2	0
bwa	2	2	0
casp	2	2	0
cbt	2	2	0
chb	2	1	1
chif	2	2	0
chrb	2	2	0
cm	2	2	0
cmet	2	0	2
crim	2	2	0
csw	2	2	0
cv-2	2	2	0
d	2	2	0
d-cup	2	2	0
dac	2	2	0
daw	2	2	0
dlp	2	2	0
dnr1	2	2	0
dnt	2	2	0
dock	2	2	0
dos	2	2	0
dpr13	2	2	0
dpr9	2	2	0
dsb	2	2	0
dve	2	2	0
dx	2	2	0
dyl	2	2	0
ed	2	2	0
emc	2	2	0
erm	2	2	0
esg	2	2	0
eya	2	2	0
eyg	2	2	0
fd96Ca	2	2	0
fend	2	1	1
fng	2	2	0
foi	2	2	0
for	2	2	0
fra	2	2	0
frm	2	2	0
ftz-f1	2	2	0
galla-1	2	2	0
gbb	2	2	0
gem	2	1	1
glec	2	2	0
goe	2	2	0
grn	2	2	0
grnd	2	2	0
gukh	2	2	0
ham	2	2	0
hkb	2	2	0
hpo	2	2	0
igl	2	2	0
inaF-B	2	2	0
isopeptidase-T-3	2	2	0
jbug	2	2	0
jp	2	2	0
jv	2	2	0
kek1	2	2	0
kek6	2	2	0
kkv	2	2	0
klu	2	2	0
ko	2	2	0
kon	2	2	0
l(1)G0193	2	1	1
l(2)k05819	2	2	0
lbk	2	2	0
lin	2	2	0
lox2	2	2	0
lqfR	2	2	0
ltl	2	2	0
mab-21	2	2	0
maf-S	2	2	0
mew	2	2	0
mgl	2	2	0
milt	2	2	0
mio	2	2	0
mmy	2	2	0
mrt	2	2	0
msn	2	2	0
mthl14	2	0	2
mts	2	2	0
mus81	2	2	0
mv	2	1	1
nab	2	2	0
nahoda	2	2	0
noc	2	2	0
norpA	2	2	0
nw	2	2	0
nwk	2	2	0
oaf	2	2	0
ome	2	2	0
opa	2	2	0
opm	2	2	0
ort	2	2	0
otk	2	2	0
otp	2	2	0
ovo	2	2	0
pHCl	2	2	0
pain	2	1	1
par-6	2	2	0
pasi2	2	2	0
pdm3	2	2	0
peb	2	2	0
pico	2	2	0
pio	2	2	0
ple	2	2	0
pnt	2	2	0
pre-lola-G	2	2	0
qless	2	2	0
qm	2	2	0
rau	2	2	0
raw	2	2	0
rdgA	2	2	0
reb	2	2	0
robo2	2	2	0
robo3	2	2	0
ru	2	2	0
run	2	2	0
rut	2	2	0
sas	2	2	0
sax	2	2	0
scb	2	2	0
scyl	2	2	0
sdt	2	2	0
sens	2	2	0
slgA	2	2	0
slow	2	2	0
sn	2	2	0
sog	2	2	0
spri	2	2	0
sqa	2	1	1
ssp6	2	2	0
stnA	2	2	0
sug	2	2	0
tara	2	2	0
tipE	2	2	0
trbl	2	2	0
trc	2	2	0
trn	2	2	0
trol	2	2	0
trp	2	2	0
tud	2	2	0
tweek	2	2	0
twit	2	2	0
unc-4	2	2	0
unc-5	2	2	0
up	2	2	0
upd1	2	2	0
upd2	2	2	0
vib	2	2	0
vri	2	1	1
w-cup	2	0	2
wgn	2	2	0
wkd	2	2	0
wnd	2	2	0
wtrw	2	2	0
yellow-f	2	2	0
zip	2	2	0
zyd	2	2	0
14-3-3zeta	1	1	0
18w	1	1	0
5-HT2B	1	1	0
ACC	1	1	0
AGBE	1	1	0
AIF	1	1	0
AOX1	1	1	0
AP-2alpha	1	1	0
AP-2sigma	1	1	0
ASPP	1	1	0
ATPsynC	1	1	0
ATPsynF	1	0	1
Aatf	1	0	1
Abi	1	1	0
Acer	1	1	0
Acox57D-d	1	1	0
Acph-1	1	1	0
Act42A	1	0	1
Act88F	1	1	0
AdSS	1	1	0
Ada2b	1	1	0
Adck	1	1	0
AdenoK	1	1	0
Adf1	1	1	0
AdipoR	1	1	0
Adk3	1	1	0
AdoR	1	1	0
Ady43A	1	1	0
Akap200	1	1	0
Alh	1	1	0
Als2	1	1	0
Ama	1	1	0
Ance-3	1	1	0
AnxB9	1	1	0
Aprt	1	1	0
Arc1	1	1	0
Archease	1	1	0
Arp3	1	0	1
Asator	1	1	0
Ask1	1	1	0
AspRS	1	1	0
Asph	1	1	0
AstA	1	1	0
AstA-R1	1	1	0
AstC-R1	1	1	0
Asx	1	1	0
Atg1	1	1	0
Atg18a	1	1	0
Atg4a	1	1	0
Atg9	1	1	0
Atpalpha	1	1	0
Atx2	1	1	0
B-H1	1	1	0
B52	1	1	0
Baldspot	1	1	0
Best2	1	1	0
Blos1	1	0	1
Br140	1	1	0
C3G	1	1	0
CAHbeta	1	1	0
CCHa1	1	0	1
CCHa2-R	1	1	0
CDase	1	1	0
CG10000	1	1	0
CG10011	1	1	0
CG10050	1	0	1
CG10086	1	1	0
CG10089	1	1	0
CG10175	1	1	0
CG10237	1	1	0
CG10252	1	1	0
CG10265	1	1	0
CG10359	1	1	0
CG10375	1	1	0
CG10376	1	1	0
CG10469	1	0	1
CG10479	1	1	0
CG10492	1	1	0
CG10508	1	1	0
CG10550	1	1	0
CG10600	1	1	0
CG10671	1	1	0
CG10738	1	1	0
CG10803	1	1	0
CG10866	1	1	0
CG10915	1	1	0
CG10932	1	1	0
CG10947	1	1	0
CG10948	1	1	0
CG10962	1	1	0
CG1103	1	1	0
CG11034	1	1	0
CG11070	1	1	0
CG11095	1	0	1
CG11168	1	1	0
CG11200	1	1	0
CG11279	1	1	0
CG1129	1	1	0
CG11318	1	1	0
CG11396	1	1	0
CG11399	1	1	0
CG11414	1	1	0
CG11426	1	1	0
CG11448	1	1	0
CG11537	1	1	0
CG11562	1	0	1
CG11617	1	1	0
CG11634	1	1	0
CG11658	1	1	0
CG11760	1	1	0
CG11768	1	1	0
CG11807	1	1	0
CG11898	1	1	0
CG11970	1	1	0
CG11982	1	1	0
CG11999	1	1	0
CG12017	1	1	0
CG12096	1	1	0
CG12099	1	1	0
CG12107	1	1	0
CG12163	1	1	0
CG12206	1	1	0
CG12239	1	1	0
CG12333	1	1	0
CG12607	1	1	0
CG12617	1	1	0
CG12688	1	1	0
CG1275	1	1	0
CG12822	1	1	0
CG12826	1	1	0
CG12848	1	0	1
CG12880	1	1	0
CG12911	1	1	0
CG12913	1	1	0
CG12929	1	1	0
CG12948	1	1	0
CG12995	1	1	0
CG13004	1	1	0
CG13024	1	1	0
CG13043	1	1	0
CG13055	1	1	0
CG13067	1	1	0
CG1307	1	1	0
CG13101	1	1	0
CG1311	1	1	0
CG13126	1	1	0
CG13157	1	1	0
CG13192	1	1	0
CG13203	1	1	0
CG13226	1	1	0
CG13229	1	1	0
CG13252	1	1	0
CG13272	1	1	0
CG13295	1	1	0
CG13305	1	1	0
CG13314	1	1	0
CG13323	1	1	0
CG13375	1	1	0
CG13437	1	1	0
CG13443	1	1	0
CG13527	1	1	0
CG1354	1	1	0
CG13541	1	1	0
CG13551	1	1	0
CG13630	1	1	0
CG13634	1	1	0
CG13643	1	1	0
CG13653	1	1	0
CG13667	1	0	1
CG13675	1	1	0
CG13676	1	1	0
CG13689	1	1	0
CG13705	1	1	0
CG1371	1	1	0
CG13723	1	1	0
CG13731	1	1	0
CG13744	1	1	0
CG13760	1	1	0
CG13773	1	1	0
CG13775	1	1	0
CG13857	1	1	0
CG13900	1	1	0
CG13920	1	1	0
CG13928	1	1	0
CG13950	1	1	0
CG14015	1	1	0
CG14017	1	1	0
CG14071	1	1	0
CG14142	1	1	0
CG14153	1	1	0
CG14164	1	1	0
CG14182	1	1	0
CG14230	1	0	1
CG14260	1	0	1
CG14270	1	1	0
CG14304	1	1	0
CG14322	1	1	0
CG14369	1	1	0
CG14440	1	1	0
CG14505	1	1	0
CG14543	1	0	1
CG14561	1	1	0
CG14566	1	1	0
CG14606	1	1	0
CG14634	1	0	1
CG14642	1	1	0
CG14762	1	1	0
CG14767	1	1	0
CG14826	1	1	0
CG14829	1	1	0
CG14830	1	1	0
CG14866	1	1	0
CG14960	1	1	0
CG14985	1	1	0
CG15024	1	1	0
CG15044	1	1	0
CG15083	1	0	1
CG15099	1	1	0
CG15130	1	1	0
CG15144	1	0	1
CG15152	1	0	1
CG15212	1	1	0
CG15249	1	1	0
CG15278	1	1	0
CG15356	1	1	0
CG15385	1	1	0
CG15387	1	1	0
CG15412	1	1	0
CG15472	1	1	0
CG15537	1	1	0
CG15543	1	1	0
CG15544	1	1	0
CG15549	1	1	0
CG15563	1	1	0
CG15695	1	1	0
CG15717	1	1	0
CG15814	1	1	0
CG15829	1	1	0
CG15894	1	1	0
CG15923	1	1	0
CG1622	1	1	0
CG1628	1	1	0
CG1636	1	1	0
CG1637	1	1	0
CG1648	1	1	0
CG1657	1	1	0
CG16717	1	1	0
CG1677	1	1	0
CG16798	1	1	0
CG16799	1	1	0
CG16854	1	1	0
CG16868	1	1	0
CG16886	1	1	0
CG16890	1	1	0
CG16908	1	0	1
CG16959	1	1	0
CG17019	1	1	0
CG17104	1	1	0
CG17124	1	1	0
CG17163	1	1	0
CG17167	1	1	0
CG17190	1	1	0
CG17272	1	1	0
CG17278	1	1	0
CG17290	1	1	0
CG17323	1	1	0
CG17352	1	1	0
CG17378	1	1	0
CG17385	1	1	0
CG17737	1	1	0
CG17839	1	1	0
CG17896	1	1	0
CG1815	1	1	0
CG18507	1	1	0
CG18585	1	1	0
CG1888	1	1	0
CG1907	1	1	0
CG1983	1	1	0
CG1986	1	1	0
CG2006	1	1	0
CG2034	1	1	0
CG2053	1	1	0
CG2061	1	1	0
CG2121	1	1	0
CG2225	1	1	0
CG2278	1	1	0
CG2608	1	1	0
CG2812	1	0	1
CG2818	1	1	0
CG2924	1	1	0
CG2993	1	1	0
CG30076	1	1	0
CG30089	1	1	0
CG3014	1	1	0
CG30148	1	1	0
CG30197	1	0	1
CG30377	1	1	0
CG30389	1	1	0
CG30391	1	0	1
CG3045	1	0	1
CG30460	1	1	0
CG30471	1	1	0
CG3061	1	0	1
CG3065	1	1	0
CG3071	1	0	1
CG3077	1	1	0
CG3078	1	1	0
CG31016	1	1	0
CG31055	1	1	0
CG31100	1	1	0
CG31235	1	1	0
CG31324	1	1	0
CG31342	1	1	0
CG31358	1	1	0
CG31547	1	1	0
CG31550	1	1	0
CG31626	1	1	0
CG3164	1	1	0
CG31663	1	1	0
CG31705	1	1	0
CG31741	1	1	0
CG31808	1	1	0
CG31871	1	1	0
CG31915	1	1	0
CG31952	1	1	0
CG3198	1	1	0
CG32066	1	1	0
CG32091	1	1	0
CG32204	1	1	0
CG32235	1	1	0
CG32262	1	1	0
CG32276	1	1	0
CG32365	1	1	0
CG32428	1	1	0
CG32547	1	0	1
CG32549	1	1	0
CG32576	1	1	0
CG32647	1	1	0
CG32651	1	1	0
CG3267	1	1	0
CG32720	1	1	0
CG32767	1	1	0
CG32809	1	1	0
CG32939	1	1	0
CG3295	1	1	0
CG33095	1	1	0
CG33116	1	1	0
CG33144	1	1	0
CG33288	1	1	0
CG33307	1	1	0
CG3348	1	1	0
CG3358	1	0	1
CG33639	1	1	0
CG33655	1	1	0
CG33704	1	1	0
CG3376	1	1	0
CG33993	1	1	0
CG33995	1	1	0
CG34112	1	1	0
CG34135	1	1	0
CG34136	1	1	0
CG34140	1	1	0
CG34141	1	1	0
CG34148	1	0	1
CG34159	1	1	0
CG34176	1	1	0
CG34191	1	1	0
CG34198	1	1	0
CG3420	1	0	1
CG34204	1	0	1
CG34213	1	0	1
CG34214	1	0	1
CG34219	1	1	0
CG34221	1	1	0
CG34250	1	1	0
CG34276	1	1	0
CG34290	1	0	1
CG34293	1	1	0
CG34307	1	0	1
CG34315	1	1	0
CG34375	1	1	0
CG34417	1	1	0
CG34437	1	0	1
CG34451	1	1	0
CG3530	1	1	0
CG3588	1	1	0
CG3625	1	1	0
CG3662	1	1	0
CG3689	1	1	0
CG3770	1	1	0
CG3777	1	1	0
CG3831	1	0	1
CG3842	1	0	1
CG3887	1	1	0
CG3902	1	1	0
CG3940	1	1	0
CG3967	1	1	0
CG4019	1	1	0
CG4089	1	0	1
CG4133	1	1	0
CG4218	1	1	0
CG42240	1	1	0
CG42258	1	1	0
CG42296	1	1	0
CG4230	1	0	1
CG42313	1	1	0
CG42326	1	1	0
CG42346	1	1	0
CG42361	1	1	0
CG42366	1	1	0
CG42374	1	1	0
CG42389	1	1	0
CG42394	1	1	0
CG42445	1	1	0
CG42504	1	1	0
CG42505	1	1	0
CG42511	1	1	0
CG42514	1	1	0
CG42516	1	1	0
CG42524	1	1	0
CG42660	1	1	0
CG42661	1	1	0
CG42666	1	1	0
CG42684	1	1	0
CG42748	1	1	0
CG42779	1	0	1
CG42797	1	1	0
CG42808	1	1	0
CG42813	1	1	0
CG43052	1	0	1
CG43110	1	1	0
CG43116	1	1	0
CG4328	1	1	0
CG43324	1	1	0
CG43337	1	1	0
CG43347	1	1	0
CG43366	1	1	0
CG4341	1	1	0
CG4360	1	1	0
CG43675	1	1	0
CG43737	1	1	0
CG43844	1	1	0
CG44000	1	1	0
CG44085	1	1	0
CG44153	1	1	0
CG44195	1	1	0
CG44245	1	1	0
CG44247	1	1	0
CG44314	1	1	0
CG44325	1	1	0
CG44355	1	1	0
CG44403	1	1	0
CG44428	1	1	0
CG44439	1	1	0
CG4462	1	1	0
CG4497	1	1	0
CG45049	1	1	0
CG45057	1	1	0
CG45061	1	1	0
CG45064	1	1	0
CG45071	1	1	0
CG45081	1	1	0
CG45100	1	1	0
CG4520	1	1	0
CG4538	1	1	0
CG4552	1	1	0
CG45544	1	1	0
CG4585	1	1	0
CG4596	1	1	0
CG46280	1	0	1
CG46301	1	1	0
CG4670	1	1	0
CG4705	1	0	1
[truncated: 895 more rows]

## Sheet: tscan mir-ngenes
mir	3'UTR + 3'UTR extension	3'UTR	3'UTR extension
miR-277	427	404	23
miR-315	368	349	19
miR-1014	244	235	9
miR-283	236	229	7
miR-137	206	199	7
miR-92/310/311/312/313	201	193	8
miR-4	199	193	6
miR-10-3p/1006	180	175	5
miR-2a-1/6/11/13/308	170	170	0
miR-316	142	138	4
miR-305	139	130	9
miR-190	138	135	3
miR-1000	137	132	5
miR-252	131	125	6
miR-14	128	128	0
miR-987	121	115	6
miR-9	117	116	1
miR-263b	116	111	5
miR-8	113	111	2
miR-1	101	101	0
miR-79	99	97	2
miR-124	97	95	2
miR-279/286/996	97	96	1
miR-981	93	89	4
miR-33	87	72	15
miR-304	84	79	5
miR-960	81	80	1
miR-iab4as	78	78	0
miR-263a	77	73	4
miR-87	74	70	4
miR-210.2	73	68	5
miR-317	72	71	1
miR-276	71	70	1
miR-927	71	65	6
miR-999	71	67	4
miR-971	70	67	3
bantam	63	60	3
miR-34	63	60	3
miR-5	62	59	3
miR-219	60	56	4
miR-210.1	59	56	3
miR-1017	57	53	4
miR-7	57	56	1
miR-994	54	53	1
miR-284	52	47	5
miR-375	52	50	2
miR-1002	50	44	6
miR-285/995/998	49	49	0
miR-1007	48	43	5
miR-980	47	44	3
miR-958	46	43	3
miR-1003/1004	44	42	2
miR-932	44	41	3
miR-964	44	43	1
miR-965	42	39	3
miR-iab-4-5p	40	40	0
miR-274	39	39	0
miR-2a-2/2c	39	39	0
let-7	38	36	2
miR-1011	38	37	1
miR-314	38	36	2
miR-281-2-3p	37	32	5
miR-307	36	35	1
miR-1010	35	31	4
miR-275/306	35	35	0
miR-31	35	28	7
miR-970	34	31	3
miR-989	34	29	5
miR-184	31	30	1
miR-281-2-5p	31	29	2
miR-957	30	29	1
miR-962	30	27	3
miR-993	29	28	1
miR-976	28	24	4
miR-988	26	26	0
miR-iab-4-3p	26	26	0
miR-3/309/318	25	24	1
miR-968	25	24	1
miR-977	25	25	0
miR-281-1	23	22	1
miR-956	22	20	2
miR-282	21	21	0
miR-10-5p	17	16	1
miR-133	17	16	1
miR-969	17	15	2
miR-986	17	17	0
miR-929	15	14	1
miR-278	13	13	0
miR-125	11	11	0
miR-955	11	11	0
miR-963	11	10	1
miR-974	11	11	0
miR-100	7	7	0
miR-193	6	6	0

## Sheet: tscan mir-nsites
mir	3'UTR + 3'UTR extension	3'UTR	3'UTR extension
miR-315	477	458	19
miR-277	464	440	24
miR-1014	271	261	10
miR-283	251	244	7
miR-137	230	222	8
miR-92/310/311/312/313	221	212	9
miR-4	212	206	6
miR-10-3p/1006	190	185	5
miR-2a-1/6/11/13/308	182	182	0
miR-190	153	150	3
miR-305	149	140	9
miR-1000	146	141	5
miR-316	143	139	4
miR-252	140	134	6
miR-987	131	125	6
miR-14	124	124	0
miR-9	122	121	1
miR-263b	121	116	5
miR-8	114	112	2
miR-79	105	103	2
miR-1	103	103	0
miR-279/286/996	100	99	1
miR-981	99	95	4
miR-124	93	91	2
miR-33	92	76	16
miR-iab4as	91	91	0
miR-304	85	80	5
miR-960	81	80	1
miR-263a	79	75	4
miR-276	76	75	1
miR-87	76	72	4
miR-210.2	74	69	5
miR-999	73	69	4
miR-927	72	66	6
miR-971	72	69	3
miR-317	70	69	1
bantam	68	65	3
miR-34	66	63	3
miR-219	64	60	4
miR-5	62	59	3
miR-7	61	60	1
miR-1017	59	55	4
miR-210.1	59	56	3
miR-994	56	55	1
miR-284	53	48	5
miR-375	52	50	2
miR-1002	50	44	6
miR-1007	50	45	5
miR-285/995/998	49	49	0
miR-980	47	44	3
miR-iab-4-5p	46	46	0
miR-1003/1004	45	43	2
miR-965	45	42	3
miR-932	44	41	3
miR-958	44	41	3
miR-964	44	43	1
let-7	40	38	2
miR-274	39	39	0
miR-281-2-3p	39	32	7
miR-2a-2/2c	39	39	0
miR-1011	38	37	1
miR-314	38	36	2
miR-1010	37	33	4
miR-275/306	36	36	0
miR-307	36	35	1
miR-31	36	29	7
miR-970	35	32	3
miR-989	35	30	5
miR-184	32	31	1
miR-281-2-5p	32	29	3
miR-962	32	29	3
miR-iab-4-3p	30	30	0
miR-957	29	28	1
miR-988	29	29	0
miR-976	28	24	4
miR-993	28	27	1
miR-3/309/318	26	25	1
miR-968	25	24	1
miR-977	25	25	0
miR-281-1	24	22	2
miR-956	22	20	2
miR-282	21	21	0
miR-10-5p	17	16	1
miR-133	17	16	1
miR-969	17	15	2
miR-986	17	17	0
miR-929	15	14	1
miR-278	13	13	0
miR-125	11	11	0
miR-955	11	11	0
miR-963	11	10	1
miR-974	11	11	0
miR-100	7	7	0
miR-193	6	6	0

## Sheet: tscan mir-gene
gene_symbol	mir	3'UTR + 3'UTR extension	3'UTR	3'UTR extension
CG18265	miR-315	6	6	0
abd-A	miR-iab4as	6	6	0
CG34355	miR-1000	5	5	0
Eip93F	miR-315	5	5	0
bru3	miR-315	5	5	0
hid	bantam	5	5	0
hth	miR-iab-4-5p	5	5	0
hth	miR-iab4as	5	5	0
jim	miR-315	5	5	0
CG34362	miR-315	4	4	0
CadN	miR-277	4	4	0
CrebA	miR-92/310/311/312/313	4	4	0
Dscam2	miR-315	4	4	0
mub	miR-137	4	4	0
pros	miR-305	4	4	0
sha	miR-92/310/311/312/313	4	4	0
sif	miR-315	4	4	0
unc-13-4A	miR-315	4	4	0
B4	miR-137	3	3	0
CG15465	miR-315	3	3	0
CG18208	miR-1014	3	3	0
CG31221	miR-190	3	3	0
CG31687	miR-315	3	3	0
CG31688	miR-315	3	3	0
CG32698	miR-277	3	3	0
CG34351	miR-315	3	3	0
CG34354	miR-315	3	3	0
CG43449	miR-315	3	3	0
CG44422	miR-315	3	3	0
Cdep	miR-315	3	3	0
Dscam1	miR-315	3	3	0
Dscam4	miR-281-2-3p	3	1	2
E(spl)m5-HLH	miR-4	3	3	0
Ephrin	miR-1010	3	3	0
NaCP60E	miR-315	3	3	0
Nplp1	miR-1000	3	3	0
Rbp6	miR-315	3	3	0
SK	miR-4	3	3	0
SKIP	miR-137	3	3	0
Ubx	miR-iab4as	3	3	0
VAChT	miR-190	3	3	0
VGAT	miR-7	3	3	0
br	miR-2a-1/6/11/13/308	3	3	0
caps	miR-988	3	3	0
cpx	miR-1014	3	3	0
fz2	miR-277	3	3	0
heph	miR-315	3	3	0
hth	miR-1014	3	3	0
lola	miR-315	3	3	0
lute	miR-10-3p/1006	3	3	0
mamo	miR-994	3	3	0
mei-P26	miR-283	3	3	0
msi	miR-277	3	2	1
nAChRalpha1	miR-277	3	3	0
nerfin-1	miR-279/286/996	3	3	0
para	miR-1014	3	3	0
para	miR-315	3	3	0
ps	miR-92/310/311/312/313	3	3	0
scrt	miR-137	3	3	0
side	miR-315	3	3	0
tio	miR-iab-4-5p	3	3	0
zfh2	miR-276	3	3	0
4EHP	miR-315	2	2	0
AGO1	miR-988	2	2	0
AcCoAS	miR-190	2	2	0
Ace	miR-190	2	2	0
Ace	miR-79	2	2	0
Ack-like	miR-277	2	2	0
Adat1	miR-3/309/318	2	2	0
Atf3	miR-283	2	2	0
Atg17	miR-315	2	2	0
Axud1	miR-277	2	2	0
Blimp-1	miR-92/310/311/312/313	2	2	0
Blimp-1	miR-977	2	2	0
BobA	miR-2a-1/6/11/13/308	2	2	0
Bsg	miR-252	2	2	0
Bx	miR-263b	2	2	0
CG10077	miR-315	2	2	0
CG10151	miR-283	2	2	0
CG10361	miR-277	2	2	0
CG10384	miR-987	2	2	0
CG11247	miR-31	2	2	0
CG11505	miR-210.2	2	2	0
CG11671	miR-137	2	0	2
CG11883	miR-283	2	2	0
CG11897	miR-252	2	2	0
CG12024	miR-92/310/311/312/313	2	2	0
CG12091	miR-304	2	2	0
CG12484	miR-315	2	2	0
CG12605	miR-137	2	2	0
CG12605	miR-981	2	2	0
CG12769	miR-315	2	2	0
CG12912	miR-10-3p/1006	2	2	0
CG12912	miR-137	2	2	0
CG13465	miR-2a-1/6/11/13/308	2	2	0
CG13506	miR-263b	2	2	0
CG13579	miR-315	2	2	0
CG13796	miR-283	2	2	0
CG14395	miR-92/310/311/312/313	2	2	0
CG14446	miR-4	2	2	0
CG14454	miR-315	2	2	0
CG14459	miR-92/310/311/312/313	2	2	0
CG14509	miR-10-3p/1006	2	2	0
CG14509	miR-315	2	2	0
CG14669	miR-137	2	2	0
CG15097	miR-970	2	2	0
CG15465	miR-219	2	2	0
CG15465	miR-981	2	2	0
CG16779	miR-219	2	2	0
CG16779	miR-277	2	2	0
CG16779	miR-283	2	2	0
CG16779	miR-987	2	2	0
CG18208	miR-315	2	2	0
CG18265	miR-1014	2	2	0
CG30083	miR-92/310/311/312/313	2	0	2
CG31140	miR-315	2	2	0
CG31195	miR-184	2	2	0
CG31323	miR-315	2	2	0
CG31635	miR-252	2	2	0
CG31814	miR-315	2	2	0
CG32206	miR-315	2	2	0
CG32333	miR-315	2	2	0
CG32521	miR-315	2	2	0
CG34362	miR-283	2	2	0
CG34377	miR-277	2	2	0
CG34384	miR-965	2	2	0
CG34394	miR-1014	2	2	0
CG34401	miR-137	2	2	0
CG3638	miR-980	2	2	0
CG42260	miR-4	2	2	0
CG42337	miR-124	2	2	0
CG42342	miR-277	2	2	0
CG42342	miR-33	2	2	0
CG4238	miR-137	2	2	0
CG42404	miR-10-3p/1006	2	2	0
CG43078	miR-277	2	2	0
CG43427	miR-315	2	2	0
CG43729	miR-1014	2	2	0
CG43732	miR-1010	2	2	0
CG43732	miR-iab4as	2	2	0
CG43739	miR-315	2	2	0
CG43739	miR-8	2	2	0
CG43739	miR-981	2	2	0
CG43783	miR-1014	2	2	0
CG43861	miR-277	2	2	0
CG4393	miR-315	2	2	0
CG4455	miR-252	2	2	0
CG4495	miR-965	2	2	0
CG4562	miR-4	2	2	0
CG4562	miR-79	2	2	0
CG46244	miR-276	2	2	0
CG46244	miR-92/310/311/312/313	2	2	0
CG4911	miR-2a-1/6/11/13/308	2	2	0
CG5466	miR-92/310/311/312/313	2	2	0
CG5466	miR-987	2	2	0
CG5599	miR-277	2	2	0
CG6006	miR-252	2	2	0
CG6024	miR-1000	2	2	0
CG7708	miR-1014	2	2	0
CG7708	miR-190	2	2	0
CG7927	miR-1007	2	2	0
CG8498	miR-210.1	2	2	0
CG9205	miR-1014	2	0	2
CG9821	miR-962	2	2	0
Cad89D	miR-92/310/311/312/313	2	2	0
CadN	miR-9	2	2	0
Camta	miR-1014	2	2	0
Camta	miR-79	2	2	0
ChAT	miR-190	2	2	0
Cip4	miR-987	2	2	0
Corin	miR-1000	2	2	0
Corin	miR-4	2	2	0
D	miR-305	2	2	0
Dll	miR-315	2	2	0
Dop1R1	miR-190	2	2	0
Dscam2	miR-10-3p/1006	2	2	0
Dyb	miR-315	2	2	0
Dys	miR-927	2	2	0
E(spl)m4-BFM	miR-4	2	2	0
E(spl)m5-HLH	miR-7	2	2	0
E(spl)m8-HLH	miR-2a-1/6/11/13/308	2	2	0
E(spl)malpha-BFM	miR-4	2	2	0
EcR	miR-315	2	2	0
EcR	miR-34	2	2	0
Ef1alpha48D	miR-305	2	2	0
Eip63E	miR-1014	2	2	0
Eip63E	miR-315	2	2	0
Eip74EF	miR-34	2	2	0
Eip93F	miR-92/310/311/312/313	2	2	0
Epac	miR-971	2	2	0
Fas2	miR-1017	2	2	0
Fife	miR-1007	2	2	0
Fife	miR-219	2	2	0
GABA-B-R3	miR-137	2	2	0
GalNAc-T1	miR-315	2	2	0
Galphao	miR-277	2	2	0
Ggamma30A	miR-315	2	2	0
GluRIB	miR-277	2	2	0
GluRIB	miR-315	2	2	0
Glut1	miR-1014	2	2	0
Glut1	miR-34	2	2	0
Glut1	miR-87	2	2	0
Glut4EF	miR-137	2	2	0
Glut4EF	miR-277	2	2	0
Glut4EF	miR-316	2	2	0
Hipk	miR-315	2	2	0
Hr39	miR-316	2	2	0
Hs3st-A	miR-137	2	2	0
Hs3st-A	miR-190	2	2	0
Indy	miR-277	2	2	0
Irk1	miR-283	2	2	0
JhI-21	miR-283	2	2	0
Kr	miR-92/310/311/312/313	2	2	0
MED19	miR-304	2	2	0
Mef2	miR-92/310/311/312/313	2	2	0
Mical	miR-263a	2	2	0
Mp	miR-277	2	2	0
Myo95E	miR-317	2	2	0
ND-B18	miR-34	2	2	0
NaCP60E	miR-2a-1/6/11/13/308	2	2	0
Nak	miR-9	2	2	0
Nckx30C	miR-315	2	2	0
Nckx30C	miR-4	2	2	0
Ndae1	miR-277	2	2	0
NetB	miR-1014	2	2	0
NetB	miR-252	2	2	0
Nmdar1	miR-999	2	2	0
Nrt	miR-315	2	2	0
Nrx-1	miR-190	2	2	0
Nrx-1	miR-277	2	2	0
Nrx-1	miR-33	2	2	0
Octbeta1R	miR-219	2	2	0
Osi6	miR-315	2	2	0
Pak	miR-277	2	2	0
Pde6	miR-315	2	1	1
Pdk	miR-1	2	2	0
Pep	bantam	2	1	1
Pkc53E	miR-316	2	2	0
Plc21C	miR-971	2	2	0
Rap1	miR-315	2	2	0
Rbfox1	miR-315	2	2	0
Rbfox1	miR-960	2	2	0
Rbp6	miR-4	2	2	0
Rdl	miR-276	2	2	0
Rdl	miR-315	2	2	0
Rdl	miR-987	2	2	0
Reph	miR-315	2	2	0
Reps	miR-283	2	2	0
Rgk3	miR-315	2	2	0
Rim	miR-33	2	2	0
SIFaR	miR-971	2	2	0
SK	miR-79	2	2	0
SKIP	miR-315	2	2	0
SP2353	miR-965	2	2	0
Sh	miR-190	2	2	0
Shab	miR-137	2	2	0
Shal	miR-315	2	2	0
Shal	miR-927	2	2	0
Sik3	miR-2a-1/6/11/13/308	2	2	0
SmD3	miR-281-1	2	0	2
SmD3	miR-281-2-3p	2	0	2
SmD3	miR-281-2-5p	2	0	2
Snoo	miR-315	2	2	0
Sox102F	miR-263a	2	2	0
SppL	miR-304	2	1	1
Src64B	miR-1014	2	2	0
Swim	miR-999	2	2	0
Syp	miR-989	2	2	0
Task6	miR-277	2	2	0
Toll-6	miR-1014	2	2	0
Tom	miR-7	2	2	0
Ts	miR-iab-4-3p	2	2	0
Tusp	miR-92/310/311/312/313	2	2	0
Usp32	miR-283	2	2	0
VGlut	miR-1000	2	2	0
VhaM8.9	miR-316	2	2	0
Vps24	miR-277	2	0	2
Vps24	miR-33	2	0	2
X11L	miR-1014	2	2	0
ab	let-7	2	2	0
ab	miR-iab-4-3p	2	2	0
beat-IIIc	miR-1014	2	2	0
beat-IIIc	miR-315	2	2	0
beat-VI	miR-315	2	2	0
beat-VII	miR-190	2	2	0
beta4GalNAcTA	miR-987	2	2	0
bol	miR-iab4as	2	2	0
bon	miR-iab-4-3p	2	2	0
bor	miR-277	2	2	0
br	let-7	2	2	0
brat	miR-1014	2	2	0
bru2	miR-9	2	2	0
bru3	miR-10-3p/1006	2	2	0
bru3	miR-5	2	2	0
bru3	miR-994	2	2	0
bs	miR-263a	2	2	0
casp	miR-277	2	2	0
cdc14	miR-980	2	2	0
chinmo	let-7	2	2	0
chinmo	miR-277	2	2	0
chinmo	miR-2a-1/6/11/13/308	2	2	0
chinmo	miR-305	2	2	0
chn	miR-4	2	2	0
comm2	miR-2a-1/6/11/13/308	2	2	0
cpo	miR-190	2	2	0
cpo	miR-9	2	2	0
cpx	miR-137	2	2	0
cpx	miR-981	2	2	0
ct	miR-1014	2	2	0
cv-2	miR-8	2	2	0
dpr13	miR-315	2	2	0
dyl	miR-987	2	2	0
eas	miR-275/306	2	2	0
elav	miR-279/286/996	2	2	0
enc	miR-981	2	2	0
ens	miR-137	2	2	0
ewg	miR-279/286/996	2	2	0
fabp	miR-988	2	2	0
fdl	miR-283	2	2	0
fkh	miR-315	2	2	0
fra	miR-315	2	2	0
fru	miR-263b	2	2	0
fru	miR-277	2	2	0
fru	miR-79	2	2	0
fz2	miR-iab4as	2	2	0
hdc	let-7	2	2	0
hdc	miR-10-3p/1006	2	2	0
hdc	miR-1014	2	2	0
hdc	miR-137	2	2	0
hdc	miR-305	2	2	0
hth	miR-283	2	2	0
ihog	miR-252	2	2	0
inaE	miR-305	2	2	0
insb	miR-279/286/996	2	2	0
jim	miR-305	2	2	0
jvl	miR-987	2	2	0
lola	bantam	2	2	0
lola	miR-10-3p/1006	2	2	0
lola	miR-277	2	2	0
lost	miR-277	2	2	0
lqf	miR-283	2	2	0
luna	miR-1003/1004	2	2	0
mamo	miR-263b	2	2	0
mamo	miR-276	2	2	0
mamo	miR-277	2	2	0
mamo	miR-2a-1/6/11/13/308	2	2	0
mamo	miR-5	2	2	0
mei-P26	miR-1000	2	2	0
mei-P26	miR-315	2	2	0
msi	miR-137	2	2	0
mtd	miR-1014	2	2	0
mub	miR-190	2	2	0
mub	miR-263b	2	2	0
mub	miR-87	2	2	0
mub	miR-92/310/311/312/313	2	2	0
nAChRalpha1	miR-315	2	2	0
nAChRalpha1	miR-999	2	2	0
nAChRalpha5	miR-1011	2	2	0
nAChRalpha5	miR-1017	2	2	0
nAChRalpha5	miR-277	2	2	0
nAChRalpha5	miR-4	2	2	0
nerfin-1	miR-305	2	2	0
olf413	miR-137	2	2	0
orb	miR-1014	2	2	0
orb	miR-315	2	2	0
orb	miR-987	2	2	0
orb2	miR-8	2	2	0
para	miR-79	2	2	0
para	miR-981	2	2	0
para	miR-iab-4-3p	2	2	0
peb	miR-9	2	2	0
pins	miR-277	2	2	0
plum	miR-1	2	2	0
pnut	miR-277	2	2	0
pros	miR-1000	2	2	0
pros	miR-1014	2	2	0
pros	miR-283	2	2	0
ps	miR-2a-1/6/11/13/308	2	2	0
ps	miR-315	2	2	0
psq	miR-962	2	2	0
px	miR-315	2	2	0
rgn	miR-137	2	2	0
rin	miR-33	2	2	0
robo1	miR-315	2	2	0
rogdi	miR-252	2	2	0
run	miR-10-3p/1006	2	2	0
scrib	miR-277	2	2	0
scrt	miR-279/286/996	2	2	0
scrt	miR-33	2	2	0
scrt	miR-981	2	2	0
shep	miR-1	2	2	0
shep	miR-92/310/311/312/313	2	2	0
side	miR-283	2	2	0
sif	miR-277	2	2	0
sm	miR-1014	2	2	0
sm	miR-315	2	2	0
sm	miR-92/310/311/312/313	2	2	0
smg	miR-284	2	2	0
smog	miR-987	2	2	0
sqd	miR-277	2	2	0
sqd	miR-315	2	2	0
sqd	miR-987	2	2	0
tai	miR-1014	2	2	0
tey	miR-315	2	1	1
ths	miR-252	2	2	0
trio	miR-315	2	2	0
ttk	miR-92/310/311/312/313	2	2	0
tutl	bantam	2	2	0
vimar	miR-277	2	2	0
vvl	miR-315	2	2	0
wdb	miR-970	2	2	0
wech	miR-305	2	2	0
zfh1	miR-277	2	2	0
14-3-3zeta	miR-1014	1	1	0
18w	miR-316	1	1	0
2mit	miR-137	1	1	0
2mit	miR-210.1	1	1	0
2mit	miR-210.2	1	1	0
2mit	miR-277	1	1	0
2mit	miR-315	1	1	0
2mit	miR-999	1	1	0
2mit	miR-iab-4-5p	1	1	0
4EHP	miR-137	1	1	0
4EHP	miR-92/310/311/312/313	1	1	0
4EHP	miR-960	1	1	0
5-HT1A	miR-315	1	1	0
5-HT1A	miR-968	1	1	0
5-HT1B	miR-10-3p/1006	1	1	0
5-HT1B	miR-219	1	1	0
5-HT1B	miR-7	1	1	0
5-HT1B	miR-965	1	1	0
5-HT2B	miR-10-3p/1006	1	1	0
5-HT7	miR-277	1	1	0
5-HT7	miR-281-2-3p	1	1	0
5-HT7	miR-283	1	1	0
5-HT7	miR-2a-1/6/11/13/308	1	1	0
5-HT7	miR-5	1	1	0
ACC	miR-277	1	1	0
AGBE	miR-10-3p/1006	1	1	0
AGO1	miR-1007	1	1	0
AGO1	miR-1017	1	1	0
AGO1	miR-137	1	1	0
AGO1	miR-284	1	1	0
AGO1	miR-315	1	1	0
AGO1	miR-4	1	1	0
AGO1	miR-9	1	1	0
AGO1	miR-987	1	1	0
AGO1	miR-999	1	1	0
AIF	miR-33	1	1	0
AOX1	miR-976	1	1	0
AP-1gamma	miR-1000	1	1	0
AP-1gamma	miR-252	1	1	0
AP-1gamma	miR-316	1	1	0
AP-1sigma	miR-4	1	1	0
AP-1sigma	miR-8	1	1	0
AP-2alpha	miR-33	1	1	0
AP-2mu	miR-1014	1	1	0
AP-2mu	miR-283	1	1	0
AP-2mu	miR-315	1	1	0
AP-2sigma	miR-317	1	1	0
ASPP	miR-965	1	1	0
ATPCL	miR-210.1	1	1	0
ATPCL	miR-276	1	1	0
ATPCL	miR-958	1	0	1
ATPsynC	miR-281-2-5p	1	1	0
ATPsynF	miR-277	1	0	1
Aatf	miR-987	1	0	1
Abd-B	miR-10-3p/1006	1	1	0
Abd-B	miR-1002	1	1	0
Abd-B	miR-276	1	1	0
Abd-B	miR-283	1	1	0
Abi	miR-315	1	1	0
Abl	miR-279/286/996	1	1	0
Abl	miR-283	1	1	0
Abl	miR-iab4as	1	1	0
Ac3	miR-219	1	1	0
Ac3	miR-283	1	1	0
Ac78C	miR-1014	1	1	0
Ac78C	miR-279/286/996	1	1	0
AcCoAS	miR-210.2	1	1	0
Ace	miR-10-3p/1006	1	1	0
Ace	miR-1000	1	1	0
Ace	miR-277	1	1	0
Ace	miR-283	1	1	0
Ace	miR-315	1	1	0
Ace	miR-317	1	1	0
Ace	miR-4	1	1	0
Ace	miR-970	1	1	0
Ace	miR-980	1	1	0
Ace	miR-987	1	1	0
Acer	miR-283	1	1	0
Ack-like	miR-124	1	1	0
Ack-like	miR-219	1	1	0
Ack-like	miR-252	1	1	0
Ack-like	miR-263a	1	1	0
Ack-like	miR-283	1	1	0
Ack-like	miR-927	1	1	0
Ack-like	miR-958	1	1	0
Ack-like	miR-964	1	1	0
Acon	miR-1000	1	1	0
Acon	miR-137	1	1	0
Acox57D-d	miR-315	1	1	0
Acph-1	miR-14	1	1	0
Act42A	miR-962	1	0	1
Act88F	miR-1017	1	1	0
AdSL	miR-124	1	1	0
AdSL	miR-190	1	1	0
AdSL	miR-987	1	1	0
AdSS	miR-252	1	1	0
Ada2b	miR-980	1	1	0
AdamTS-A	miR-92/310/311/312/313	1	1	0
AdamTS-A	miR-960	1	1	0
Adar	miR-1014	1	1	0
Adar	miR-137	1	1	0
Adar	miR-275/306	1	1	0
Adar	miR-277	1	1	0
Adar	miR-2a-1/6/11/13/308	1	1	0
Adar	miR-316	1	1	0
Adar	miR-7	1	1	0
Adar	miR-964	1	1	0
Adat1	miR-969	1	1	0
Adck	miR-305	1	1	0
AdenoK	miR-10-3p/1006	1	1	0
Adf1	miR-92/310/311/312/313	1	1	0
AdipoR	miR-33	1	1	0
Adk3	miR-317	1	1	0
AdoR	miR-960	1	1	0
Ady43A	miR-9	1	1	0
Aef1	miR-276	1	1	0
Aef1	miR-304	1	1	0
Aef1	miR-965	1	1	0
Aef1	miR-iab-4-5p	1	1	0
Afti	bantam	1	1	0
Afti	miR-8	1	1	0
Akap200	miR-976	1	1	0
Alh	miR-1002	1	1	0
Alk	miR-10-5p	1	1	0
Alk	miR-284	1	1	0
Alk	miR-4	1	1	0
Als2	miR-1	1	1	0
Ama	miR-124	1	1	0
Amph	miR-190	1	1	0
Amph	miR-375	1	1	0
Amph	miR-4	1	1	0
Amun	miR-1014	1	1	0
Amun	miR-281-2-5p	1	1	0
Amun	miR-315	1	1	0
Ance-3	miR-210.2	1	1	0
Antp	miR-1000	1	1	0
Antp	miR-304	1	1	0
Antp	miR-9	1	1	0
Antp	miR-92/310/311/312/313	1	1	0
Antp	miR-976	1	1	0
Antp	miR-iab-4-3p	1	1	0
Antp	miR-iab4as	1	1	0
AnxB9	miR-277	1	1	0
Appl	miR-137	1	1	0
Appl	miR-281-2-3p	1	0	1
Appl	miR-281-2-5p	1	1	0
Appl	miR-283	1	1	0
Appl	miR-317	1	1	0
Aprt	miR-277	1	1	0
Arc1	miR-14	1	1	0
Archease	miR-33	1	1	0
Arf51F	miR-124	1	1	0
Arf51F	miR-137	1	1	0
Arp3	miR-33	1	0	1
Arr1	let-7	1	1	0
Arr1	miR-284	1	1	0
Ars2	miR-92/310/311/312/313	1	1	0
Ars2	miR-981	1	1	0
Art4	miR-263b	1	0	1
Art4	miR-277	1	0	1
Art4	miR-33	1	0	1
Art4	miR-87	1	1	0
Asap	miR-283	1	1	0
Asap	miR-307	1	1	0
Asap	miR-8	1	1	0
Asator	miR-2a-1/6/11/13/308	1	1	0
Ask1	miR-124	1	1	0
AspRS	miR-14	1	1	0
Asph	miR-4	1	1	0
AstA	miR-92/310/311/312/313	1	1	0
AstA-R1	miR-932	1	1	0
AstC-R1	miR-8	1	1	0
Asx	miR-1011	1	1	0
Atf3	let-7	1	1	0
Atf3	miR-1	1	1	0
Atf3	miR-275/306	1	1	0
Atf3	miR-285/995/998	1	1	0
Atf3	miR-971	1	1	0
Atg1	miR-994	1	1	0
Atg17	miR-263b	1	1	0
Atg18a	miR-219	1	1	0
Atg18b	miR-79	1	1	0
Atg18b	miR-960	1	1	0
Atg4a	miR-970	1	1	0
Atg9	miR-137	1	1	0
Atox1	miR-315	1	1	0
Atox1	miR-970	1	1	0
Atpalpha	miR-277	1	1	0
Atx2	miR-994	1	1	0
Awh	miR-1	1	1	0
Awh	miR-210.2	1	1	0
Awh	miR-999	1	1	0
Axud1	miR-1014	1	1	0
B-H1	miR-1010	1	1	0
B4	miR-277	1	1	0
B4	miR-315	1	1	0
B4	miR-960	1	1	0
B52	miR-994	1	1	0
BOD1	bantam	1	1	0
BOD1	miR-277	1	1	0
Bacc	miR-283	1	1	0
Bacc	miR-8	1	1	0
Baldspot	miR-375	1	1	0
Best2	miR-283	1	1	0
Bgb	miR-314	1	1	0
Bgb	miR-960	1	1	0
Blimp-1	miR-1014	1	1	0
Blimp-1	miR-277	1	1	0
Blimp-1	miR-307	1	1	0
Blimp-1	miR-315	1	1	0
Blimp-1	miR-971	1	1	0
Blimp-1	miR-iab4as	1	1	0
Blos1	miR-190	1	0	1
Bmcp	miR-277	1	1	0
Bmcp	miR-305	1	1	0
BobA	miR-14	1	1	0
Br140	miR-315	1	1	0
Bsg	miR-10-3p/1006	1	1	0
Bsg	miR-100	1	1	0
Bsg	miR-277	1	1	0
Bsg	miR-304	1	1	0
Bsg	miR-4	1	1	0
Bsg	miR-927	1	1	0
Bsg	miR-999	1	1	0
Bsg25D	miR-316	1	1	0
Bsg25D	miR-8	1	1	0
Bsg25D	miR-987	1	1	0
BtbVII	miR-1011	1	1	0
BtbVII	miR-314	1	1	0
Btk29A	miR-283	1	1	0
Btk29A	miR-957	1	1	0
BuGZ	miR-137	1	1	0
BuGZ	miR-252	1	1	0
BuGZ	miR-277	1	1	0
BuGZ	miR-284	1	1	0
BuGZ	miR-315	1	1	0
BuGZ	miR-989	1	1	0
Bx	miR-278	1	1	0
Bx	miR-315	1	1	0
Bx	miR-9	1	1	0
C15	miR-4	1	1	0
C15	miR-79	1	1	0
C3G	miR-971	1	1	0
CAHbeta	miR-2a-1/6/11/13/308	1	1	0
CAP	miR-1014	1	1	0
CAP	miR-124	1	1	0
CASK	miR-10-3p/1006	1	1	0
CASK	miR-1003/1004	1	1	0
CASK	miR-1007	1	1	0
CASK	miR-283	1	1	0
CASK	miR-315	1	1	0
CASK	miR-33	1	1	0
CCAP-R	miR-1000	1	1	0
CCAP-R	miR-282	1	1	0
CCHa1	miR-252	1	0	1
CCHa2-R	bantam	1	1	0
CDase	miR-4	1	1	0
CG10000	miR-315	1	1	0
CG10005	miR-283	1	1	0
CG10005	miR-2a-1/6/11/13/308	1	1	0
CG10011	miR-9	1	1	0
CG10019	miR-1014	1	1	0
CG10019	miR-279/286/996	1	1	0
CG10019	miR-317	1	1	0
CG10019	miR-4	1	1	0
CG10050	miR-375	1	0	1
CG10055	miR-1014	1	1	0
CG10055	miR-277	1	1	0
CG10055	miR-285/995/998	1	1	0
CG10055	miR-987	1	1	0
CG10077	miR-314	1	1	0
CG10077	miR-956	1	1	0
CG10077	miR-965	1	1	0
CG10082	miR-277	1	1	0
CG10082	miR-305	1	1	0
CG10082	miR-33	1	1	0
CG10082	miR-8	1	1	0
CG10086	miR-8	1	1	0
CG10089	miR-304	1	1	0
CG10175	miR-994	1	1	0
CG10195	miR-277	1	1	0
CG10195	miR-315	1	1	0
CG10217	miR-124	1	1	0
CG10217	miR-184	1	1	0
CG10217	miR-958	1	1	0
CG10237	miR-965	1	1	0
CG10252	miR-92/310/311/312/313	1	1	0
CG10254	miR-314	1	1	0
CG10254	miR-956	1	1	0
CG10265	miR-9	1	1	0
CG10289	miR-1014	1	1	0
CG10289	miR-124	1	1	0
CG10289	miR-2a-1/6/11/13/308	1	1	0
CG10289	miR-305	1	1	0
CG10289	miR-317	1	1	0
CG10289	miR-4	1	1	0
CG10289	miR-7	1	1	0
CG10289	miR-8	1	1	0
CG10289	miR-87	1	1	0
CG10289	miR-980	1	1	0
CG10289	miR-981	1	1	0
CG10289	miR-999	1	1	0
CG10289	miR-iab4as	1	1	0
CG10338	miR-190	1	1	0
CG10338	miR-977	1	1	0
CG10345	miR-283	1	1	0
CG10345	miR-2a-1/6/11/13/308	1	1	0
CG10345	miR-929	1	1	0
CG10345	miR-999	1	1	0
CG10359	miR-277	1	1	0
CG10375	miR-932	1	1	0
CG10376	miR-277	1	1	0
CG10384	miR-278	1	1	0
CG10384	miR-315	1	1	0
CG10384	miR-957	1	1	0
CG10444	miR-7	1	1	0
CG10444	miR-iab-4-3p	1	1	0
CG10469	miR-284	1	0	1
CG10479	miR-1010	1	1	0
CG10492	miR-999	1	1	0
CG10508	miR-263b	1	1	0
CG10512	miR-277	1	1	0
CG10512	miR-9	1	1	0
CG10543	miR-315	1	1	0
CG10543	miR-375	1	1	0
CG10543	miR-994	1	1	0
CG10543	miR-iab-4-3p	1	1	0
CG10550	miR-2a-1/6/11/13/308	1	1	0
CG10570	miR-137	1	1	0
CG10570	miR-987	1	1	0
CG10600	miR-282	1	1	0
CG10663	miR-282	1	1	0
CG10663	miR-2a-2/2c	1	1	0
CG10671	miR-932	1	1	0
CG10710	miR-184	1	1	0
CG10710	miR-34	1	1	0
CG10734	miR-932	1	0	1
CG10734	miR-971	1	0	1
CG10737	miR-283	1	1	0
CG10737	miR-92/310/311/312/313	1	1	0
CG10738	miR-279/286/996	1	1	0
CG10803	miR-263a	1	1	0
CG10804	miR-1000	1	1	0
CG10804	miR-14	1	1	0
CG10804	miR-957	1	1	0
CG10866	miR-210.1	1	1	0
CG1090	miR-7	1	1	0
CG1090	miR-987	1	1	0
CG10915	miR-960	1	1	0
CG10932	miR-277	1	1	0
CG10936	miR-4	1	1	0
CG10936	miR-79	1	1	0
CG10947	miR-960	1	1	0
CG10948	miR-285/995/998	1	1	0
CG10953	miR-1007	1	1	0
CG10953	miR-1017	1	1	0
CG10960	miR-14	1	1	0
CG10960	miR-316	1	1	0
CG10962	miR-315	1	1	0
CG1103	miR-124	1	1	0
CG11030	miR-10-3p/1006	1	1	0
CG11030	miR-1014	1	1	0
CG11030	miR-14	1	1	0
CG11030	miR-33	1	1	0
CG11030	miR-986	1	1	0
CG11030	miR-993	1	1	0
CG11034	miR-279/286/996	1	1	0
CG11044	miR-1017	1	1	0
CG11044	miR-4	1	1	0
CG11070	miR-9	1	1	0
CG11095	miR-960	1	0	1
CG11168	miR-9	1	1	0
CG11200	miR-1	1	1	0
CG11221	miR-279/286/996	1	1	0
CG11221	miR-7	1	1	0
CG11247	miR-263a	1	1	0
CG11247	miR-277	1	1	0
CG11279	miR-1002	1	1	0
CG1129	miR-124	1	1	0
CG11318	miR-375	1	1	0
CG11319	miR-307	1	1	0
CG11319	miR-4	1	1	0
CG11319	miR-960	1	1	0
CG11319	miR-986	1	1	0
CG11319	miR-987	1	1	0
CG1136	miR-31	1	1	0
CG1136	miR-92/310/311/312/313	1	1	0
CG11396	miR-1	1	1	0
CG11399	miR-210.1	1	1	0
CG11406	miR-1014	1	1	0
CG11406	miR-124	1	1	0
CG11406	miR-315	1	1	0
CG11406	miR-iab-4-5p	1	1	0
CG11414	miR-4	1	1	0
CG11426	miR-1	1	1	0
CG11448	miR-1014	1	1	0
CG11486	miR-210.2	1	1	0
CG11486	miR-305	1	1	0
CG11505	miR-210.1	1	1	0
CG11505	miR-252	1	1	0
CG11505	miR-263a	1	1	0
CG11505	miR-277	1	1	0
CG11505	miR-283	1	1	0
CG11505	miR-34	1	1	0
CG11505	miR-87	1	1	0
CG11537	miR-4	1	1	0
CG11562	miR-927	1	0	1
CG11576	miR-1000	1	1	0
CG11576	miR-283	1	1	0
CG11593	miR-1014	1	1	0
CG11593	miR-283	1	1	0
CG11593	miR-375	1	1	0
CG11617	miR-92/310/311/312/313	1	1	0
CG11634	miR-976	1	1	0
CG11652	miR-305	1	1	0
CG11652	miR-317	1	1	0
CG11658	miR-285/995/998	1	1	0
CG11671	miR-315	1	0	1
CG1172	miR-87	1	1	0
CG1172	miR-962	1	1	0
CG1172	miR-999	1	1	0
CG11760	miR-1011	1	1	0
CG11768	miR-980	1	1	0
CG11781	miR-263a	1	0	1
CG11781	miR-316	1	0	1
CG11781	miR-989	1	0	1
CG11807	miR-92/310/311/312/313	1	1	0
CG11873	miR-137	1	1	0
CG11873	miR-929	1	1	0
CG11880	miR-307	1	1	0
CG11880	miR-87	1	1	0
CG11883	miR-137	1	1	0
CG11883	miR-277	1	1	0
CG11883	miR-999	1	1	0
CG11897	miR-10-3p/1006	1	1	0
CG11897	miR-137	1	1	0
CG11897	miR-iab4as	1	1	0
CG11898	miR-14	1	1	0
CG11970	miR-282	1	1	0
CG11982	miR-283	1	1	0
CG11999	miR-1014	1	1	0
CG12004	miR-252	1	1	0
CG12004	miR-315	1	1	0
CG12004	miR-iab4as	1	1	0
CG12017	miR-92/310/311/312/313	1	1	0
CG12025	miR-4	1	1	0
CG12025	miR-87	1	1	0
CG12054	bantam	1	1	0
CG12054	miR-14	1	1	0
CG12054	miR-2a-1/6/11/13/308	1	1	0
CG12054	miR-2a-2/2c	1	1	0
CG12054	miR-5	1	1	0
CG12054	miR-994	1	1	0
CG12054	miR-iab-4-5p	1	1	0
CG12071	miR-190	1	1	0
CG12071	miR-315	1	1	0
CG12075	miR-124	1	1	0
CG12075	miR-283	1	1	0
CG12091	miR-283	1	1	0
CG12096	miR-274	1	1	0
CG12099	miR-1011	1	1	0
CG12107	miR-277	1	1	0
CG12163	miR-1014	1	1	0
CG12194	miR-190	1	1	0
CG12194	miR-210.1	1	1	0
CG12206	miR-283	1	1	0
CG12213	miR-277	1	1	0
CG12213	miR-2a-1/6/11/13/308	1	1	0
CG12239	miR-976	1	1	0
CG12290	miR-10-3p/1006	1	1	0
CG12290	miR-284	1	1	0
CG12290	miR-314	1	1	0
CG12290	miR-4	1	1	0
CG12290	miR-8	1	1	0
CG12333	miR-956	1	1	0
CG12344	miR-285/995/998	1	1	0
CG12344	miR-305	1	1	0
CG12344	miR-87	1	1	0
CG12484	miR-277	1	1	0
CG12484	miR-4	1	1	0
CG12484	miR-iab4as	1	1	0
CG12531	miR-14	1	1	0
CG12531	miR-190	1	1	0
CG12531	miR-263b	1	1	0
CG12531	miR-277	1	1	0
CG12531	miR-283	1	0	1
CG12605	miR-1000	1	1	0
CG12605	miR-190	1	1	0
CG12605	miR-316	1	1	0
CG12607	miR-305	1	1	0
CG12617	miR-315	1	1	0
CG1265	miR-190	1	0	1
CG1265	miR-277	1	0	1
CG12688	miR-977	1	1	0
CG1273	miR-304	1	1	0
CG1273	miR-iab-4-5p	1	1	0
CG1275	miR-285/995/998	1	1	0
CG12769	miR-184	1	1	0
CG12769	miR-317	1	1	0
CG12773	miR-137	1	1	0
CG12773	miR-277	1	1	0
CG12773	miR-5	1	1	0
CG12814	miR-1	1	1	0
CG12814	miR-277	1	1	0
CG12822	miR-1017	1	1	0
CG12826	miR-962	1	1	0
CG12831	miR-10-3p/1006	1	1	0
CG12831	miR-1002	1	1	0
CG12831	miR-305	1	1	0
CG12831	miR-958	1	1	0
CG12848	miR-284	1	0	1
CG12851	miR-1017	1	1	0
CG12851	miR-219	1	1	0
CG12851	miR-993	1	1	0
CG12858	miR-190	1	1	0
CG12858	miR-283	1	1	0
CG12880	miR-14	1	1	0
CG12911	miR-87	1	1	0
CG12912	bantam	1	1	0
CG12912	miR-210.1	1	1	0
CG12912	miR-281-2-3p	1	1	0
CG12912	miR-282	1	1	0
CG12912	miR-305	1	1	0
CG12912	miR-317	1	1	0
CG12912	miR-977	1	1	0
CG12912	miR-981	1	1	0
CG12912	miR-iab-4-5p	1	1	0
CG12913	miR-1000	1	1	0
CG12929	miR-1	1	1	0
CG12948	miR-1	1	1	0
CG12995	miR-2a-1/6/11/13/308	1	1	0
CG13004	miR-279/286/996	1	1	0
CG13024	miR-2a-1/6/11/13/308	1	1	0
CG13043	miR-10-3p/1006	1	1	0
CG13054	miR-10-3p/1006	1	0	1
CG13054	miR-190	1	0	1
CG13054	miR-929	1	0	1
CG13055	miR-124	1	1	0
CG13067	miR-277	1	1	0
CG1307	miR-137	1	1	0
CG13101	miR-283	1	1	0
CG1311	miR-210.2	1	1	0
CG13124	miR-137	1	1	0
CG13124	miR-277	1	1	0
CG13126	miR-277	1	1	0
CG13157	miR-125	1	1	0
CG1317	miR-4	1	1	0
CG1317	miR-79	1	1	0
CG13192	miR-987	1	1	0
CG13197	miR-275/306	1	1	0
CG13197	miR-987	1	1	0
CG13197	miR-999	1	1	0
CG13203	miR-277	1	1	0
CG13226	miR-8	1	1	0
CG13229	miR-1014	1	1	0
CG13252	bantam	1	1	0
CG13255	miR-279/286/996	1	1	0
CG13255	miR-283	1	0	1
CG13255	miR-958	1	1	0
CG13272	miR-4	1	1	0
CG13287	miR-283	1	1	0
CG13287	miR-92/310/311/312/313	1	1	0
CG13293	miR-277	1	1	0
CG13293	miR-315	1	1	0
CG13293	miR-79	1	1	0
CG13295	miR-124	1	1	0
CG13300	miR-1	1	1	0
CG13300	miR-10-3p/1006	1	1	0
CG13300	miR-252	1	1	0
CG13300	miR-315	1	1	0
CG13300	miR-9	1	1	0
CG13305	miR-988	1	1	0
CG13314	miR-124	1	1	0
CG13323	miR-10-3p/1006	1	1	0
CG13344	miR-279/286/996	1	1	0
CG13344	miR-316	1	1	0
CG13375	miR-971	1	1	0
CG13384	miR-10-3p/1006	1	1	0
CG13384	miR-1000	1	1	0
CG13384	miR-210.1	1	1	0
CG13398	miR-92/310/311/312/313	1	1	0
CG13398	miR-981	1	1	0
CG13437	miR-2a-1/6/11/13/308	1	1	0
CG13443	miR-1014	1	1	0
CG13465	miR-14	1	1	0
CG13465	miR-7	1	1	0
CG13506	miR-137	1	1	0
CG13506	miR-9	1	1	0
CG13506	miR-927	1	1	0
CG13506	miR-964	1	1	0
CG13506	miR-iab4as	1	1	0
CG13527	miR-1014	1	1	0
CG1354	miR-277	1	1	0
CG13541	miR-79	1	1	0
CG13551	miR-277	1	1	0
CG13578	miR-4	1	1	0
CG13578	miR-79	1	1	0
CG1358	miR-1014	1	1	0
CG1358	miR-4	1	1	0
CG13606	miR-4	1	1	0
CG13606	miR-92/310/311/312/313	1	1	0
CG13630	miR-4	1	1	0
CG13631	miR-1	1	1	0
CG13631	miR-282	1	1	0
CG13631	miR-87	1	1	0
CG13631	miR-92/310/311/312/313	1	1	0
CG13634	miR-4	1	1	0
CG13643	miR-1014	1	1	0
CG13653	miR-92/310/311/312/313	1	1	0
CG13667	miR-7	1	0	1
CG13675	miR-315	1	1	0
CG13676	miR-960	1	1	0
CG13685	miR-927	1	1	0
CG13685	miR-964	1	1	0
CG13689	miR-210.2	1	1	0
CG13705	miR-305	1	1	0
CG1371	miR-304	1	1	0
CG13723	miR-315	1	1	0
CG13731	miR-279/286/996	1	1	0
CG13739	miR-210.1	1	1	0
CG13739	miR-277	1	1	0
CG13739	miR-4	1	1	0
CG13739	miR-8	1	1	0
CG13739	miR-957	1	1	0
CG13739	miR-993	1	1	0
CG13743	miR-1011	1	1	0
CG13743	miR-190	1	1	0
CG13743	miR-275/306	1	1	0
CG13743	miR-276	1	1	0
CG13743	miR-281-1	1	1	0
CG13743	miR-305	1	1	0
CG13743	miR-955	1	1	0
CG13744	miR-92/310/311/312/313	1	1	0
CG13760	miR-275/306	1	1	0
CG13773	miR-305	1	1	0
CG13775	miR-7	1	1	0
CG13784	miR-1014	1	1	0
CG13784	miR-137	1	1	0
CG13784	miR-304	1	1	0
CG13784	miR-7	1	1	0
CG13784	miR-987	1	1	0
CG13827	miR-1002	1	0	1
CG13827	miR-1014	1	0	1
CG13827	miR-283	1	0	1
CG13857	miR-277	1	1	0
CG13900	miR-1	1	1	0
CG13917	miR-277	1	1	0
CG13917	miR-283	1	1	0
CG13920	miR-263b	1	1	0
CG13928	miR-277	1	1	0
CG13933	miR-315	1	1	0
CG13933	miR-92/310/311/312/313	1	1	0
CG13950	miR-999	1	1	0
CG13954	miR-210.1	1	1	0
CG13954	miR-277	1	1	0
CG13954	miR-4	1	1	0
CG13954	miR-8	1	1	0
CG13954	miR-957	1	1	0
CG13954	miR-993	1	1	0
CG13995	miR-137	1	1	0
CG13995	miR-315	1	1	0
CG13995	miR-5	1	1	0
CG14015	miR-4	1	1	0
CG14017	miR-14	1	1	0
CG1402	miR-1000	1	1	0
CG1402	miR-277	1	1	0
CG1402	miR-92/310/311/312/313	1	1	0
CG14042	miR-263a	1	1	0
CG14042	miR-279/286/996	1	1	0
CG14042	miR-92/310/311/312/313	1	1	0
CG14042	miR-988	1	1	0
CG14071	miR-iab-4-5p	1	1	0
CG14082	miR-190	1	1	0
CG14082	miR-284	1	1	0
CG14082	miR-987	1	1	0
CG14082	miR-993	1	1	0
CG14131	miR-8	1	1	0
CG14131	miR-994	1	1	0
CG14142	miR-285/995/998	1	1	0
CG14153	miR-263b	1	1	0
CG14164	miR-9	1	1	0
CG14182	miR-2a-1/6/11/13/308	1	1	0
CG14186	miR-1014	1	1	0
CG14186	miR-190	1	1	0
CG14186	miR-4	1	1	0
CG14230	miR-277	1	0	1
CG14260	miR-210.2	1	0	1
CG14270	miR-2a-1/6/11/13/308	1	1	0
CG14274	miR-137	1	1	0
CG14274	miR-277	1	1	0
CG14274	miR-4	1	1	0
CG14274	miR-987	1	1	0
CG14304	miR-31	1	1	0
CG14322	miR-277	1	1	0
CG14369	miR-304	1	1	0
CG14372	miR-1014	1	0	1
CG14372	miR-252	1	0	1
CG14440	miR-279/286/996	1	1	0
CG14446	miR-1007	1	1	0
CG14446	miR-1017	1	1	0
CG14446	miR-184	1	1	0
CG14446	miR-263a	1	1	0
CG14446	miR-279/286/996	1	1	0
CG14446	miR-283	1	1	0
CG14446	miR-33	1	1	0
CG14446	miR-993	1	1	0
CG14459	miR-1003/1004	1	1	0
CG14459	miR-137	1	1	0
CG14459	miR-277	1	1	0
CG14459	miR-2a-1/6/11/13/308	1	1	0
CG14459	miR-2a-2/2c	1	1	0
CG14459	miR-315	1	1	0
CG14478	miR-1011	1	1	0
CG14478	miR-4	1	1	0
CG14478	miR-79	1	1	0
CG14478	miR-iab4as	1	1	0
CG14505	miR-999	1	1	0
CG14506	miR-1	1	1	0
CG14506	miR-275/306	1	1	0
CG14506	miR-281-2-3p	1	1	0
CG14509	miR-133	1	1	0
CG14509	miR-987	1	1	0
CG14535	miR-1	1	1	0
CG14535	miR-33	1	1	0
CG14543	miR-317	1	0	1
CG14561	miR-9	1	1	0
CG14562	miR-1	1	1	0
CG14562	miR-283	1	1	0
CG14566	miR-281-1	1	1	0
CG14606	miR-2a-1/6/11/13/308	1	1	0
CG14608	miR-33	1	1	0
CG14608	miR-960	1	1	0
CG14634	miR-277	1	0	1
CG14642	miR-281-1	1	1	0
CG14669	bantam	1	1	0
CG14669	miR-210.1	1	1	0
CG14669	miR-281-1	1	1	0
CG14669	miR-315	1	1	0
CG14693	miR-315	1	1	0
CG14693	miR-968	1	1	0
CG14718	miR-1014	1	1	0
CG14718	miR-976	1	1	0
CG14762	miR-190	1	1	0
CG14767	miR-31	1	1	0
CG14826	miR-315	1	1	0
CG14829	miR-1000	1	1	0
CG14830	miR-275/306	1	1	0
CG14853	miR-190	1	1	0
CG14853	miR-210.2	1	1	0
CG14853	miR-252	1	1	0
CG14853	miR-277	1	1	0
CG14866	miR-1014	1	1	0
CG14949	miR-14	1	1	0
CG14949	miR-316	1	1	0
CG14960	miR-4	1	1	0
CG14964	miR-iab-4-5p	1	1	0
CG14964	miR-iab4as	1	1	0
CG14985	miR-974	1	1	0
CG15024	miR-9	1	1	0
CG15044	miR-2a-1/6/11/13/308	1	1	0
CG15080	miR-4	1	1	0
CG15080	miR-79	1	1	0
CG15083	miR-10-5p	1	0	1
CG15097	miR-279/286/996	1	1	0
CG15099	miR-993	1	1	0
CG15130	miR-34	1	1	0
CG15144	miR-976	1	0	1
CG15152	miR-962	1	0	1
CG15212	miR-279/286/996	1	1	0
CG15236	miR-100	1	1	0
CG15236	miR-277	1	1	0
CG15236	miR-315	1	1	0
CG15249	miR-2a-1/6/11/13/308	1	1	0
CG15270	miR-284	1	1	0
CG15270	miR-5	1	1	0
CG15270	miR-981	1	1	0
CG15278	miR-315	1	1	0
CG15312	miR-14	1	1	0
CG15312	miR-2a-1/6/11/13/308	1	1	0
CG15312	miR-305	1	1	0
CG15312	miR-957	1	1	0
CG15356	miR-1014	1	1	0
CG15385	miR-2a-1/6/11/13/308	1	1	0
CG15387	miR-277	1	1	0
CG15412	miR-283	1	1	0
CG15431	miR-252	1	1	0
CG15431	miR-315	1	1	0
CG15465	let-7	1	1	0
CG15465	miR-1014	1	1	0
CG15465	miR-14	1	1	0
CG15465	miR-184	1	1	0
CG15465	miR-210.1	1	1	0
CG15465	miR-210.2	1	1	0
CG15465	miR-275/306	1	1	0
CG15465	miR-276	1	1	0
CG15465	miR-284	1	1	0
CG15465	miR-307	1	1	0
CG15465	miR-316	1	1	0
CG15465	miR-932	1	1	0
CG15465	miR-969	1	1	0
CG15465	miR-980	1	1	0
CG15472	miR-987	1	1	0
CG15537	miR-976	1	1	0
CG15543	miR-315	1	1	0
CG15544	miR-10-3p/1006	1	1	0
CG15549	miR-92/310/311/312/313	1	1	0
CG15563	miR-9	1	1	0
CG15673	miR-283	1	1	0
CG15673	miR-2a-1/6/11/13/308	1	1	0
CG15695	miR-281-2-3p	1	1	0
CG15717	miR-285/995/998	1	1	0
CG15725	miR-10-3p/1006	1	1	0
CG15725	miR-315	1	1	0
CG15814	miR-279/286/996	1	1	0
CG15829	miR-277	1	1	0
CG15894	miR-277	1	1	0
CG15923	miR-976	1	1	0
CG1607	miR-1000	1	1	0
CG1607	miR-14	1	1	0
CG1607	miR-190	1	1	0
CG1622	miR-981	1	1	0
CG1628	miR-263b	1	1	0
CG1636	miR-316	1	1	0
CG1637	miR-8	1	1	0
CG1646	bantam	1	1	0
CG1646	miR-193	1	1	0
CG1646	miR-305	1	1	0
CG1648	miR-987	1	1	0
CG1657	miR-994	1	1	0
CG16717	miR-1014	1	1	0
CG1673	miR-277	1	1	0
CG1673	miR-314	1	1	0
CG1677	miR-277	1	1	0
CG16779	miR-190	1	1	0
CG16779	miR-252	1	1	0
CG16779	miR-279/286/996	1	1	0
CG16779	miR-307	1	1	0
CG16779	miR-316	1	1	0
CG16779	miR-8	1	1	0
CG16779	miR-92/310/311/312/313	1	1	0
CG16779	miR-964	1	1	0
CG16779	miR-981	1	1	0
CG16779	miR-iab-4-3p	1	1	0
CG16791	miR-1014	1	1	0
CG16791	miR-963	1	1	0
CG16791	miR-987	1	1	0
CG16798	miR-284	1	1	0
CG16799	miR-277	1	1	0
CG16854	miR-1000	1	1	0
CG16868	miR-252	1	1	0
CG16886	miR-252	1	1	0
CG16890	miR-2a-2/2c	1	1	0
CG16908	miR-1014	1	0	1
CG16947	miR-1014	1	1	0
CG16947	miR-31	1	1	0
CG16947	miR-986	1	1	0
CG16953	miR-14	1	1	0
CG16953	miR-210.2	1	1	0
CG16953	miR-87	1	1	0
CG16959	miR-263a	1	1	0
CG17019	miR-1	1	1	0
CG17104	miR-927	1	1	0
CG17124	miR-34	1	1	0
CG17163	miR-87	1	1	0
CG17167	miR-283	1	1	0
CG17190	miR-2a-1/6/11/13/308	1	1	0
CG17193	miR-133	1	1	0
CG17193	miR-277	1	1	0
CG17193	miR-375	1	1	0
CG17193	miR-987	1	1	0
CG17271	miR-92/310/311/312/313	1	1	0
CG17271	miR-958	1	1	0
CG17272	miR-1	1	1	0
CG17278	miR-283	1	1	0
CG17290	miR-315	1	1	0
CG17323	miR-283	1	1	0
CG17352	miR-92/310/311/312/313	1	1	0
CG17360	miR-283	1	1	0
CG17360	miR-960	1	1	0
CG17378	miR-987	1	1	0
CG17385	miR-315	1	1	0
CG17386	miR-2a-1/6/11/13/308	1	1	0
CG17386	miR-34	1	1	0
CG17386	miR-79	1	1	0
CG17593	miR-137	1	1	0
CG17593	miR-263a	1	1	0
CG17724	miR-283	1	1	0
CG17724	miR-5	1	1	0
CG17737	miR-137	1	1	0
CG17765	miR-277	1	1	0
CG17765	miR-305	1	1	0
CG17765	miR-34	1	0	1
CG17786	miR-315	1	1	0
CG17786	miR-970	1	1	0
CG17807	miR-79	1	0	1
CG17807	miR-994	1	0	1
CG17816	miR-1007	1	1	0
CG17816	miR-34	1	1	0
CG17816	miR-8	1	1	0
CG17816	miR-989	1	1	0
CG17834	miR-263b	1	1	0
CG17834	miR-8	1	1	0
CG17839	miR-2a-1/6/11/13/308	1	1	0
CG17896	miR-277	1	1	0
CG17985	miR-100	1	1	0
CG17985	miR-190	1	1	0
CG1814	miR-10-3p/1006	1	1	0
CG1814	miR-87	1	1	0
CG1815	miR-968	1	1	0
CG18208	miR-1000	1	1	0
CG18208	miR-137	1	1	0
CG18208	miR-263a	1	1	0
CG18208	miR-285/995/998	1	1	0
CG18208	miR-2a-2/2c	1	1	0
CG18208	miR-7	1	1	0
CG18208	miR-9	1	1	0
CG18208	miR-958	1	1	0
CG18208	miR-981	1	1	0
CG18265	let-7	1	1	0
CG18265	miR-1	1	1	0
CG18265	miR-124	1	1	0
CG18265	miR-125	1	1	0
CG18265	miR-14	1	1	0
CG18265	miR-276	1	1	0
CG18265	miR-279/286/996	1	1	0
CG18265	miR-305	1	1	0
CG18265	miR-316	1	1	0
CG18265	miR-92/310/311/312/313	1	1	0
CG18265	miR-969	1	1	0
CG18265	miR-977	1	1	0
CG18265	miR-iab4as	1	1	0
CG18420	miR-1014	1	1	0
CG18420	miR-315	1	1	0
CG18480	miR-9	1	1	0
CG18480	miR-976	1	1	0
CG18480	miR-987	1	1	0
CG18480	miR-999	1	1	0
CG18507	miR-1014	1	1	0
CG18549	miR-1000	1	1	0
CG18549	miR-7	1	1	0
CG18585	miR-285/995/998	1	1	0
CG18769	miR-1014	1	1	0
CG18769	miR-307	1	1	0
CG18769	miR-315	1	1	0
CG18769	miR-4	1	1	0
CG18812	miR-1011	1	1	0
CG18812	miR-125	1	1	0
CG18812	miR-970	1	1	0
CG18812	miR-971	1	1	0
CG18812	miR-994	1	1	0
CG18815	miR-137	1	1	0
CG18815	miR-315	1	1	0
CG18815	miR-5	1	1	0
CG18870	miR-275/306	1	1	0
CG18870	miR-317	1	1	0
CG18870	miR-957	1	1	0
CG18870	miR-iab4as	1	1	0
CG1888	miR-980	1	1	0
CG1902	miR-10-3p/1006	1	1	0
CG1902	miR-210.2	1	1	0
CG1902	miR-283	1	1	0
CG1907	miR-1000	1	1	0
CG1983	miR-263b	1	1	0
CG1986	miR-276	1	1	0
CG2006	miR-31	1	1	0
CG2034	miR-305	1	1	0
CG2053	miR-33	1	1	0
CG2061	miR-279/286/996	1	1	0
CG2082	miR-1002	1	1	0
CG2082	miR-315	1	1	0
CG2121	miR-283	1	1	0
CG2162	miR-315	1	1	0
CG2162	miR-87	1	1	0
CG2217	miR-219	1	1	0
CG2217	miR-315	1	1	0
CG2225	miR-14	1	1	0
CG2269	miR-315	1	1	0
CG2269	miR-980	1	1	0
CG2278	miR-137	1	1	0
CG2519	miR-279/286/996	1	1	0
CG2519	miR-304	1	1	0
CG2528	miR-283	1	1	0
CG2528	miR-932	1	1	0
CG2608	miR-137	1	1	0
CG2812	miR-987	1	0	1
CG2818	miR-277	1	1	0
CG2841	miR-1002	1	1	0
CG2841	miR-274	1	1	0
CG2865	miR-2a-1/6/11/13/308	1	1	0
CG2865	miR-2a-2/2c	1	1	0
CG2865	miR-92/310/311/312/313	1	1	0
CG2924	miR-927	1	1	0
CG2991	miR-304	1	1	0
CG2991	miR-87	1	1	0
CG2993	miR-315	1	1	0
CG30069	miR-1000	1	1	0
CG30069	miR-281-1	1	1	0
CG30069	miR-281-2-3p	1	1	0
CG30076	miR-9	1	1	0
CG30083	miR-263a	1	0	1
CG30083	miR-927	1	0	1
CG30089	miR-1014	1	1	0
CG30116	miR-137	1	1	0
CG30116	miR-219	1	1	0
CG30116	miR-283	1	1	0
CG3014	miR-1000	1	1	0
CG30148	miR-283	1	1	0
CG30158	miR-10-5p	1	1	0
CG30158	miR-133	1	1	0
CG30158	miR-87	1	1	0
CG30177	miR-14	1	1	0
CG30177	miR-316	1	1	0
CG30197	miR-10-3p/1006	1	0	1
CG30222	miR-927	1	1	0
CG30222	miR-964	1	1	0
CG30343	miR-1000	1	1	0
CG30343	miR-137	1	1	0
CG3036	miR-210.1	1	1	0
CG3036	miR-304	1	1	0
CG30377	miR-8	1	1	0
CG30389	miR-304	1	1	0
CG30391	miR-34	1	0	1
CG30419	miR-1002	1	1	0
CG30419	miR-1007	1	1	0
CG30419	miR-275/306	1	1	0
CG30419	miR-9	1	1	0
CG30419	miR-974	1	1	0
CG3045	miR-79	1	0	1
CG30460	miR-14	1	1	0
CG30463	miR-124	1	1	0
CG30463	miR-190	1	1	0
CG30463	miR-274	1	1	0
CG30463	miR-277	1	1	0
CG30463	miR-92/310/311/312/313	1	1	0
CG30471	miR-2a-1/6/11/13/308	1	1	0
CG30497	miR-1014	1	1	0
CG30497	miR-304	1	1	0
CG3061	miR-284	1	0	1
CG3065	miR-305	1	1	0
CG3071	miR-10-3p/1006	1	0	1
CG3077	miR-92/310/311/312/313	1	1	0
CG3078	miR-1010	1	1	0
CG31016	miR-277	1	1	0
CG31055	miR-14	1	1	0
CG31075	miR-277	1	1	0
CG31075	miR-304	1	0	1
CG31100	miR-283	1	1	0
CG31122	miR-5	1	1	0
CG31122	miR-92/310/311/312/313	1	1	0
CG31122	miR-965	1	1	0
CG31122	miR-994	1	1	0
CG31140	miR-1014	1	1	0
CG31140	miR-277	1	1	0
CG31140	miR-305	1	1	0
CG31140	miR-5	1	1	0
CG31140	miR-92/310/311/312/313	1	1	0
CG31145	miR-263b	1	1	0
CG31145	miR-316	1	1	0
CG31145	miR-4	1	1	0
CG31145	miR-79	1	1	0
CG31176	miR-10-3p/1006	1	1	0
CG31176	miR-263a	1	1	0
CG31176	miR-8	1	1	0
CG31176	miR-927	1	1	0
CG31195	miR-1014	1	1	0
CG31195	miR-124	1	1	0
CG31206	miR-92/310/311/312/313	1	0	1
CG31206	miR-989	1	0	1
CG31221	miR-1	1	1	0
CG31221	miR-210.2	1	1	0
CG31221	miR-932	1	1	0
CG31221	miR-963	1	1	0
CG31224	miR-92/310/311/312/313	1	1	0
CG31224	miR-927	1	1	0
CG31235	miR-263b	1	1	0
CG31323	miR-1011	1	1	0
CG31323	miR-1014	1	1	0
CG31323	miR-137	1	1	0
CG31323	miR-988	1	1	0
CG31323	miR-993	1	1	0
CG31323	miR-999	1	1	0
CG31324	miR-965	1	1	0
CG31342	miR-137	1	1	0
CG31358	miR-317	1	1	0
CG31431	miR-14	1	1	0
CG31431	miR-965	1	1	0
CG31475	miR-283	1	1	0
CG31475	miR-iab4as	1	1	0
CG31523	miR-219	1	1	0
CG31523	miR-283	1	1	0
CG31547	miR-305	1	1	0
CG31550	miR-305	1	1	0
CG31626	miR-304	1	1	0
CG3163	miR-277	1	0	1
CG3163	miR-980	1	0	1
CG31635	bantam	1	1	0
CG31635	miR-283	1	1	0
CG31637	miR-10-3p/1006	1	1	0
CG31637	miR-92/310/311/312/313	1	1	0
CG3164	miR-79	1	1	0
CG31663	miR-283	1	1	0
CG31678	miR-276	1	1	0
CG31678	miR-5	1	1	0
CG31687	miR-210.1	1	1	0
CG31687	miR-34	1	1	0
CG31687	miR-4	1	1	0
CG31687	miR-92/310/311/312/313	1	1	0
CG31688	miR-1000	1	1	0
CG31688	miR-210.1	1	1	0
CG31688	miR-274	1	1	0
CG31688	miR-34	1	1	0
CG31688	miR-4	1	1	0
CG31688	miR-92/310/311/312/313	1	1	0
CG31688	miR-977	1	1	0
CG31705	miR-10-3p/1006	1	1	0
CG31712	miR-1003/1004	1	1	0
CG31712	miR-31	1	1	0
CG31712	miR-987	1	1	0
CG31730	miR-210.1	1	0	1
CG31730	miR-210.2	1	0	1
CG31741	miR-14	1	1	0
CG31760	miR-315	1	0	1
CG31760	miR-87	1	1	0
CG31808	miR-277	1	1	0
CG31814	miR-10-3p/1006	1	1	0
CG31814	miR-277	1	1	0
CG31849	miR-1014	1	1	0
CG31849	miR-2a-1/6/11/13/308	1	1	0
CG31871	miR-2a-1/6/11/13/308	1	1	0
CG31915	miR-124	1	1	0
CG31952	miR-315	1	1	0
CG3198	miR-1014	1	1	0
CG32066	miR-277	1	1	0
CG32085	miR-276	1	1	0
CG32085	miR-283	1	1	0
CG32085	miR-2a-1/6/11/13/308	1	1	0
CG32085	miR-315	1	0	1
CG32085	miR-316	1	1	0
CG32085	miR-4	1	0	1
CG32091	miR-2a-1/6/11/13/308	1	1	0
CG32103	miR-1014	1	1	0
CG32103	miR-281-2-5p	1	1	0
CG32103	miR-316	1	1	0
CG32103	miR-994	1	1	0
CG32137	miR-1011	1	1	0
CG32137	miR-190	1	1	0
CG32137	miR-315	1	1	0
CG32137	miR-965	1	1	0
CG32152	miR-1	1	1	0
CG32152	miR-14	1	1	0
CG32152	miR-2a-1/6/11/13/308	1	1	0
CG32152	miR-316	1	1	0
CG32152	miR-34	1	1	0
CG32195	miR-137	1	1	0
CG32195	miR-315	1	1	0
CG32195	miR-92/310/311/312/313	1	1	0
CG32204	miR-283	1	1	0
CG32206	miR-263b	1	1	0
CG32206	miR-276	1	1	0
CG32206	miR-5	1	1	0
CG32206	miR-989	1	1	0
CG32219	miR-263a	1	0	1
CG32219	miR-277	1	0	1
CG32235	miR-274	1	1	0
CG32262	miR-282	1	1	0
CG32264	miR-137	1	1	0
CG32264	miR-190	1	1	0
CG32264	miR-281-1	1	1	0
CG32264	miR-304	1	1	0
CG32264	miR-315	1	1	0
CG32264	miR-971	1	1	0
CG32276	miR-277	1	1	0
CG32278	miR-4	1	0	1
CG32278	miR-969	1	0	1
CG32333	miR-1007	1	1	0
CG32333	miR-1014	1	1	0
CG32333	miR-1017	1	1	0
CG32333	miR-277	1	1	0
CG32333	miR-279/286/996	1	1	0
CG32333	miR-999	1	1	0
CG32333	miR-iab-4-5p	1	1	0
CG32333	miR-iab4as	1	1	0
CG32365	miR-8	1	1	0
CG32369	miR-1	1	1	0
CG32369	miR-10-3p/1006	1	1	0
CG32369	miR-219	1	1	0
CG32369	miR-969	1	1	0
CG32425	miR-252	1	1	0
CG32425	miR-315	1	1	0
CG32428	miR-252	1	1	0
CG32432	miR-1000	1	0	1
CG32432	miR-283	1	0	1
CG32432	miR-927	1	0	1
CG32447	miR-133	1	1	0
CG32447	miR-281-2-3p	1	1	0
CG32447	miR-315	1	1	0
CG32447	miR-969	1	1	0
CG32486	bantam	1	1	0
CG32486	miR-971	1	1	0
CG32532	miR-137	1	1	0
CG32532	miR-304	1	1	0
CG32532	miR-315	1	1	0
CG32547	miR-1003/1004	1	0	1
CG32549	miR-10-3p/1006	1	1	0
CG32576	miR-219	1	1	0
CG32647	miR-285/995/998	1	1	0
CG32651	miR-284	1	1	0
CG3267	miR-277	1	1	0
CG32676	miR-284	1	1	0
CG32676	miR-305	1	1	0
CG32676	miR-4	1	1	0
CG32676	miR-980	1	1	0
CG32698	miR-1000	1	1	0
CG32698	miR-1002	1	1	0
CG32698	miR-1014	1	1	0
CG32698	miR-283	1	1	0
CG32698	miR-315	1	1	0
CG32720	miR-960	1	1	0
CG32758	miR-277	1	1	0
CG32758	miR-283	1	1	0
CG32767	miR-87	1	1	0
CG32809	miR-193	1	1	0
CG32813	miR-252	1	1	0
CG32813	miR-263b	1	1	0
CG32813	miR-279/286/996	1	1	0
CG32815	miR-14	1	1	0
CG32815	miR-277	1	1	0
CG32815	miR-87	1	1	0
CG32939	miR-964	1	1	0
CG3295	miR-994	1	1	0
CG3308	miR-10-3p/1006	1	1	0
CG3308	miR-124	1	1	0
CG3308	miR-263b	1	1	0
CG3308	miR-304	1	1	0
CG33082	miR-100	1	1	0
CG33082	miR-305	1	1	0
CG33082	miR-971	1	1	0
CG33090	miR-305	1	1	0
CG33090	miR-4	1	1	0
CG33090	miR-79	1	1	0
CG33090	miR-9	1	1	0
CG33090	miR-993	1	1	0
CG33095	miR-277	1	1	0
CG33096	miR-219	1	1	0
CG33096	miR-277	1	1	0
CG33111	miR-1	1	1	0
CG33111	miR-124	1	1	0
CG33111	miR-277	1	1	0
CG33111	miR-317	1	1	0
CG33116	miR-304	1	1	0
CG33143	miR-1014	1	1	0
CG33143	miR-190	1	1	0
CG33143	miR-315	1	1	0
CG33143	miR-4	1	1	0
CG33143	miR-932	1	1	0
CG33143	miR-981	1	1	0
CG33144	miR-283	1	1	0
CG33181	miR-1000	1	1	0
CG33181	miR-1002	1	1	0
CG33181	miR-317	1	1	0
CG33181	miR-5	1	1	0
CG33203	miR-137	1	1	0
CG33203	miR-375	1	1	0
CG33288	miR-277	1	1	0
CG33298	miR-2a-1/6/11/13/308	1	1	0
CG33298	miR-2a-2/2c	1	1	0
CG33307	miR-92/310/311/312/313	1	1	0
CG3348	miR-305	1	1	0
CG33521	miR-4	1	1	0
CG33521	miR-964	1	1	0
CG33543	miR-1014	1	1	0
CG33543	miR-2a-1/6/11/13/308	1	1	0
CG33543	miR-92/310/311/312/313	1	1	0
CG3358	miR-277	1	0	1
CG33639	miR-283	1	1	0
CG33655	miR-92/310/311/312/313	1	1	0
CG33704	miR-315	1	1	0
CG3376	miR-92/310/311/312/313	1	1	0
CG33970	miR-124	1	1	0
CG33970	miR-315	1	1	0
CG33981	miR-276	1	1	0
CG33981	miR-958	1	1	0
CG33993	miR-2a-2/2c	1	1	0
CG33995	miR-277	1	1	0
CG3408	miR-92/310/311/312/313	1	1	0
CG3408	miR-957	1	1	0
CG3409	miR-33	1	1	0
CG3409	miR-34	1	1	0
CG3409	miR-970	1	1	0
CG34112	miR-252	1	1	0
CG34113	miR-1000	1	1	0
CG34113	miR-1014	1	1	0
CG34113	miR-14	1	1	0
CG34113	miR-316	1	1	0
CG34113	miR-955	1	1	0
CG34113	miR-981	1	1	0
CG34114	miR-137	1	1	0
CG34114	miR-277	1	1	0
CG34114	miR-5	1	1	0
CG34114	miR-994	1	1	0
CG34126	miR-14	1	1	0
CG34126	miR-283	1	1	0
CG34126	miR-315	1	1	0
CG34133	miR-263b	1	0	1
CG34133	miR-33	1	0	1
CG34135	miR-980	1	1	0
CG34136	miR-9	1	1	0
CG34140	miR-278	1	1	0
CG34141	miR-277	1	1	0
CG34148	miR-277	1	0	1
CG34155	miR-315	1	1	0
CG34155	miR-375	1	1	0
CG34159	miR-34	1	1	0
CG34176	miR-1014	1	1	0
CG34191	miR-304	1	1	0
CG34198	miR-92/310/311/312/313	1	1	0
CG3420	miR-964	1	0	1
CG34204	miR-315	1	0	1
CG34213	miR-304	1	0	1
CG34214	miR-963	1	0	1
CG34219	miR-1002	1	1	0
CG34221	miR-92/310/311/312/313	1	1	0
CG34250	miR-125	1	1	0
CG34276	miR-315	1	1	0
CG34290	miR-33	1	0	1
CG34293	miR-263b	1	1	0
CG34307	miR-315	1	0	1
CG34313	miR-1	1	1	0
CG34313	miR-277	1	1	0
CG34313	miR-92/310/311/312/313	1	1	0
CG34315	miR-305	1	1	0
CG34342	miR-277	1	1	0
CG34342	miR-92/310/311/312/313	1	1	0
CG34347	miR-1002	1	1	0
CG34347	miR-315	1	1	0
CG34351	miR-1002	1	1	0
CG34351	miR-137	1	1	0
CG34351	miR-283	1	1	0
CG34351	miR-968	1	1	0
CG34351	miR-971	1	1	0
CG34351	miR-999	1	1	0
CG34353	miR-10-3p/1006	1	1	0
CG34353	miR-79	1	1	0
CG34353	miR-9	1	1	0
CG34355	miR-10-3p/1006	1	1	0
CG34355	miR-190	1	1	0
CG34355	miR-210.1	1	1	0
CG34355	miR-252	1	1	0
CG34355	miR-285/995/998	1	1	0
CG34356	miR-1014	1	0	1
CG34356	miR-219	1	1	0
CG34356	miR-252	1	1	0
CG34356	miR-315	1	1	0
CG34356	miR-971	1	1	0
CG34356	miR-iab4as	1	1	0
CG34357	miR-1014	1	1	0
CG34357	miR-219	1	1	0
CG34357	miR-4	1	1	0
CG34362	miR-190	1	1	0
CG34362	miR-210.2	1	1	0
CG34362	miR-277	1	1	0
CG34362	miR-8	1	1	0
CG34362	miR-iab-4-3p	1	1	0
CG34371	miR-314	1	1	0
CG34371	miR-315	1	1	0
CG34371	miR-316	1	1	0
CG34375	miR-277	1	1	0
CG34376	miR-1014	1	1	0
CG34376	miR-305	1	1	0
CG34376	miR-960	1	1	0
CG34377	miR-1010	1	1	0
CG34377	miR-92/310/311/312/313	1	1	0
CG34380	miR-10-3p/1006	1	1	0
CG34380	miR-277	1	1	0
CG34380	miR-2a-2/2c	1	1	0
CG34380	miR-5	1	1	0
CG34383	miR-10-3p/1006	1	1	0
CG34383	miR-190	1	1	0
CG34383	miR-274	1	1	0
CG34383	miR-277	1	1	0
CG34383	miR-304	1	1	0
CG34383	miR-305	1	1	0
CG34383	miR-315	1	1	0
CG34383	miR-34	1	1	0
CG34383	miR-981	1	1	0
CG34384	miR-10-3p/1006	1	1	0
CG34384	miR-137	1	1	0
CG34384	miR-2a-1/6/11/13/308	1	1	0
CG34384	miR-305	1	1	0
CG34384	miR-87	1	1	0
CG34384	miR-92/310/311/312/313	1	1	0
CG34384	miR-927	1	1	0
CG34394	miR-274	1	1	0
CG34394	miR-277	1	1	0
CG34394	miR-927	1	1	0
CG34398	miR-276	1	1	0
CG34398	miR-317	1	1	0
CG34401	miR-317	1	1	0
CG34401	miR-4	1	1	0
CG34417	miR-31	1	1	0
CG34437	miR-133	1	0	1
CG34449	miR-1007	1	1	0
CG34449	miR-1017	1	1	0
CG34451	miR-980	1	1	0
CG34461	miR-263a	1	1	0
CG34461	miR-277	1	1	0
CG3530	miR-277	1	1	0
CG3534	miR-2a-1/6/11/13/308	1	1	0
CG3534	miR-92/310/311/312/313	1	1	0
CG3548	miR-277	1	1	0
CG3548	miR-307	1	1	0
CG3548	miR-8	1	1	0
CG3548	miR-960	1	1	0
CG3556	miR-1007	1	1	0
CG3556	miR-1017	1	1	0
CG3556	miR-315	1	1	0
CG3588	miR-277	1	1	0
CG3611	miR-1010	1	1	0
CG3611	miR-1017	1	1	0
CG3611	miR-33	1	1	0
CG3625	miR-2a-2/2c	1	1	0
CG3638	miR-277	1	1	0
CG3638	miR-304	1	1	0
CG3638	miR-9	1	1	0
CG3655	miR-124	1	1	0
CG3655	miR-14	1	1	0
CG3662	miR-10-3p/1006	1	1	0
CG3689	miR-986	1	1	0
CG3714	miR-124	1	1	0
CG3714	miR-210.2	1	1	0
CG3714	miR-305	1	1	0
CG3760	miR-263a	1	0	1
CG3760	miR-277	1	1	0
CG3764	miR-10-3p/1006	1	1	0
CG3764	miR-960	1	1	0
CG3770	miR-314	1	1	0
CG3777	miR-79	1	1	0
CG3793	miR-5	1	1	0
CG3793	miR-994	1	1	0
CG3800	miR-1014	1	1	0
CG3800	miR-2a-1/6/11/13/308	1	1	0
CG3822	miR-277	1	1	0
CG3822	miR-932	1	1	0
CG3822	miR-999	1	1	0
CG3829	miR-10-3p/1006	1	1	0
CG3829	miR-304	1	1	0
CG3831	miR-1002	1	0	1
CG3842	miR-92/310/311/312/313	1	0	1
CG3887	miR-971	1	1	0
CG3902	miR-277	1	1	0
CG3940	miR-9	1	1	0
CG3961	miR-137	1	1	0
CG3961	miR-4	1	1	0
CG3961	miR-981	1	1	0
CG3967	miR-1014	1	1	0
CG4019	miR-10-3p/1006	1	1	0
CG4022	bantam	1	1	0
CG4022	miR-137	1	1	0
CG4022	miR-263a	1	1	0
CG4089	miR-1014	1	0	1
CG4133	miR-987	1	1	0
CG4168	miR-190	1	1	0
CG4168	miR-219	1	1	0
CG4218	miR-971	1	1	0
CG42240	miR-957	1	1	0
CG42245	miR-1	1	1	0
CG42245	miR-988	1	1	0
CG42258	miR-277	1	1	0
CG42260	miR-190	1	1	0
CG42260	miR-281-2-5p	1	1	0
CG42260	miR-307	1	1	0
CG42260	miR-315	1	1	0
CG42260	miR-987	1	1	0
CG42260	miR-993	1	1	0
CG42261	miR-277	1	1	0
CG42261	miR-932	1	1	0
CG42261	miR-981	1	1	0
CG42265	miR-1003/1004	1	1	0
CG42265	miR-277	1	1	0
CG42265	miR-8	1	1	0
CG42296	miR-964	1	1	0
CG4230	miR-33	1	0	1
CG42306	miR-276	1	1	0
CG42306	miR-31	1	1	0
CG42306	miR-316	1	1	0
CG42307	miR-10-5p	1	1	0
CG42307	miR-14	1	1	0
CG42313	miR-316	1	1	0
CG42322	miR-210.2	1	1	0
CG42322	miR-87	1	1	0
CG42324	miR-315	1	1	0
CG42324	miR-92/310/311/312/313	1	1	0
CG42324	miR-964	1	1	0
CG42326	miR-304	1	1	0
CG42327	miR-1017	1	1	0
CG42327	miR-4	1	1	0
CG42337	miR-263a	1	1	0
CG42337	miR-277	1	1	0
CG42340	miR-1011	1	1	0
CG42340	miR-968	1	1	0
CG42342	miR-263b	1	1	0
CG42346	miR-315	1	1	0
CG42361	miR-iab4as	1	1	0
CG42366	miR-2a-1/6/11/13/308	1	1	0
CG42374	miR-277	1	1	0
CG4238	miR-277	1	1	0
CG4238	miR-315	1	1	0
CG42389	miR-1014	1	1	0
CG42394	miR-305	1	1	0
CG42404	miR-137	1	1	0
CG42404	miR-193	1	1	0
CG42404	miR-304	1	1	0
CG42404	miR-34	1	1	0
CG42445	miR-932	1	1	0
CG42455	miR-277	1	1	0
CG42455	miR-988	1	1	0
CG42458	miR-1017	1	1	0
CG42458	miR-190	1	1	0
CG42458	miR-8	1	1	0
CG42458	miR-92/310/311/312/313	1	1	0
CG42458	miR-993	1	1	0
CG42492	miR-2a-1/6/11/13/308	1	1	0
CG42492	miR-315	1	1	0
CG42492	miR-34	1	1	0
CG42502	miR-137	1	1	0
CG42502	miR-305	1	1	0
CG42502	miR-987	1	1	0
CG42504	miR-317	1	1	0
CG42505	miR-317	1	1	0
CG42511	miR-276	1	1	0
CG42514	miR-316	1	1	0
CG42516	miR-955	1	1	0
CG42524	miR-981	1	1	0
CG42534	miR-277	1	1	0
CG42534	miR-980	1	1	0
CG42534	miR-987	1	1	0
CG42534	miR-iab-4-5p	1	1	0
CG42534	miR-iab4as	1	1	0
CG42540	miR-10-3p/1006	1	1	0
CG42540	miR-927	1	1	0
CG42594	miR-278	1	1	0
CG42594	miR-8	1	1	0
CG42594	miR-iab4as	1	1	0
CG42613	miR-1010	1	1	0
CG42613	miR-316	1	1	0
CG42613	miR-999	1	1	0
CG42613	miR-iab4as	1	1	0
CG4266	miR-3/309/318	1	1	0
CG4266	miR-304	1	1	0
CG42660	miR-1000	1	1	0
CG42661	miR-1000	1	1	0
CG42663	miR-210.1	1	1	0
CG42663	miR-305	1	1	0
CG42663	miR-316	1	1	0
CG42663	miR-7	1	1	0
CG42663	miR-957	1	1	0
CG42666	miR-2a-1/6/11/13/308	1	1	0
CG42671	miR-932	1	1	0
CG42671	miR-960	1	1	0
CG42674	miR-1	1	1	0
CG42674	miR-4	1	1	0
CG42676	miR-219	1	1	0
CG42676	miR-277	1	1	0
CG42676	miR-955	1	1	0
CG42684	miR-9	1	1	0
CG4269	miR-2a-1/6/11/13/308	1	1	0
CG4269	miR-2a-2/2c	1	1	0
CG42700	miR-1000	1	1	0
CG42700	miR-1014	1	1	0
CG42700	miR-2a-1/6/11/13/308	1	1	0
CG42700	miR-315	1	1	0
CG42724	miR-210.2	1	1	0
CG42724	miR-219	1	1	0
CG42724	miR-285/995/998	1	1	0
CG42741	miR-137	1	1	0
CG42741	miR-285/995/998	1	1	0
CG42747	miR-283	1	1	0
CG42747	miR-970	1	1	0
CG42747	miR-981	1	1	0
CG42747	miR-993	1	1	0
CG42748	miR-263b	1	1	0
CG42750	miR-10-3p/1006	1	1	0
CG42750	miR-190	1	1	0
CG42750	miR-219	1	1	0
CG42750	miR-4	1	1	0
CG42779	miR-1014	1	0	1
[truncated: 4,900 more rows]
